# Supplementary material for: In Silico Verification of Predicted Potential Promoter Sequences in the Rice (Oryza sativa) Genome
Source: MDPI journal article supplement (doi:10.3390/plants12203573), 2023-10-14
Supplement: s1 [file s1]

**Table S1.** Predicted potential promoters from 1st chromosome of the rice genome: the coordinates of the beginning and end of the predicted promoter sequences (start and end) in the *O. sativa* rice genome; DNA strand orientation (strand); the length of promoter sequence (length) serial number of predicted promoter (№); nucleotide sequence (sequence). TATA-motifs are in **bold**.

Cis-acting element involved in:

the abscisic acid responsiveness (ACGTG, AAACA, CACGTG, CGTACGTGCA),  
low-temperature responsiveness (CCGAAA),  
the MeJA-responsiveness (TGACG, CGTCA),  
anaerobic induction (AAACCA),  
gibberellin-responsiveness (TATCCCA),  
phytochrome down-regulation expression (TGATTTTACA, GGATTTTAAAGT),  
light responsiveness (CACGAC, ACACGTGT, TACGTG, CACGTT, CACGTC),  
auxin responsiveness (GGTCCAT),  
meristem expression (GCCACT).

As well as just: учтено

cis-acting regulatory element (CCGTCC),  
common cis-acting element in promoter and enhancer regions (CAAAT, CCAAT, CCCAATTT, TGCCAAC, CAACCAACTCC).

(when crossing different cis-acting elements, some parts were highlighted by changing font color)

| Sr. No. | start    | end      | length | strand | sequence                                                                                                                                                                                                                                                                                                                                                                                                                                                                                                                                                                                                                                                                |
|---------|----------|----------|--------|--------|-------------------------------------------------------------------------------------------------------------------------------------------------------------------------------------------------------------------------------------------------------------------------------------------------------------------------------------------------------------------------------------------------------------------------------------------------------------------------------------------------------------------------------------------------------------------------------------------------------------------------------------------------------------------------|
| 1       | 5634017  | 5634492  | 476    | -      | GATAGGATATTTTGTCCCAAAACAAAGTTGGGTTTGTAAAGCTGCTTTGGTTACCTAAAATT<br>TTGCAACATTTTGTGCAATTTTGTGT <b>TATATAT</b> GATTTTCTTTATTT <b>TATATA</b> AGTTT<br>GAATATTTATGCATGTAAC <b>TTATA</b> AATTT <b>TATA</b> TGGACTGTAAGTTTATTCATGTTTAAAG<br>TTAAATAATTTATTGTTCAAT <b>CCGAAA</b> GAAGTAACTTTACAGTGGAGCGATGAGAAGTA<br>TTGT <b>TATA</b> TTGTCAATCCATGAATGCAAAAAGTGACTGAAAT <b>TATTTAAAA</b> TTTTATGGAC <b>CC</b><br><b>GAAA</b> TCTTTACATCC <b>TTATA</b> AATTTAAATGTCTCCCG <b>TGACCTG</b> AGCAAAAATTC <b>AAATAT</b><br><b>AAA</b> CAACTATTACAACAAAGCATGCAACT <b>TTATATATAC</b> ATGATTTCC <b>TATACA</b> ATAC<br>TCCCTTATTTT <b>TAATATAC</b> GACATTGTTTATCTCATTAAAAAA               |
| 2       | 23193444 | 23193966 | 523    | -      | GAATCTGGTGCTATGGAGAATGGAGAAAGAATCTAGAATCAGGTTGTTGTTTTGTTGACTT<br>GTTTTCCCTTATGAATTATCCTCATCAAAATAAGTGCATGTAACAAAAAAGTT <b>TATAT</b><br><b>AA</b> ATAACATGATGTAAGTATGACTTTAACATTAAACAAACAAAGAGGTGTAAGTAGTAA<br><b>TATAC</b> ATGTGTTCAAGATAACAAGATTTGGTAGAATTTACGATCCCATGATTTT <b>TATATT</b><br><b>TATATTT</b> CAGAAACAACGTTTAGAATTAGCACAGAAGTATTGCATGCTTCACAT <b>AAACCA</b> T<br>CACTTCATTTAAGGACAAAGGGCCAAACAAAAAGATGTGCAGCAAAAGCCAACCTTTTCGTG<br>GAGTACTTTTGATAGCCTCCATAAAACTTTGCATCTCCCTCAATATGACAAGGCTATCTGA<br>TAATGGTGTTCAATCCCATCAATTGCACTCTTTCCATCTCTCCTAGAGAAAGGGCGGCTGA<br>CTGAAGCGCATATCGCATGTGCATCAGCTCAA                                                    |
| 3       | 24122935 | 24123517 | 583    | +      | AACAGCTTCTAAATGTCTAATCTCCCCTCTAACCTC <b>TTACA</b> <b>AAACCA</b> TTTGCCTCTT <b>GTAT</b><br><b>TAT</b> CACTGCTCAGTGCTCACCTGTACCAAGCCGTTTTCAAGAACATTTGCGAATTGTTAG<br>TCGTTGGCTCACTTCATTATGCATATCTGTTTGAATCTTTGTTTCATTGTTTGGTCAGCCGG<br>TCGAGTTAGCCAGCAACCATTGCCAAGAGATCAGTGAAACCTATCCTCAATTGGTCTCTGA<br>AATGCTGGCCATGGCGCCATGTCGATTATGTCAGATTGGTCAGTGATCCGGTCAGGTTAGG<br>TCAGAAGATCTCCGGGTTGCCGGGGCCGTGGGGCATGGCGCCGCCGCCACCGCCGCCGCG<br>GCGCAGGTCGGCCTGCCGGAGGTGCAGGGACAGCGCGTAGTTGGACGCCTCCAGCCGCC<br>GCACCTGCTCCCTGTAGTCGTCGAGCTGCCACCGGAGCTCCCGCTGCGCCTTCTCTGCGCG<br>GTCCGCAGCCGGTGTTGGAACAGCACCGCCCTCTTGAGGAACCCGATCTGCCTCGACGCG<br>GCGTCCAGCCTCGCGGCGGTGCCAGCGCCGACA |
| 4       | 24237415 | 24237903 | 489    | -      | AATT <b>CTATAG</b> CACCTCCGGTTACGAGGGACACGGTCGCATGCTCTGTAAAGCTTGGAATGT<br>ATTTTATGTTGAACCACTCAGCTTCTGGAGGTAATTGTTGGATAATTTTGAAGATGTATGTATTAAT<br>TCTTAAAGTTGCTAGTTCAAGTTT <b>TATAC</b> GTAGGAGTTGATTGAAAAACAATTTCTTTT<br>TGTCCATTTCTGTTATGGACGATTATCTATTTATCCATTTCTAA <b>ATTATA</b> AGCTGTACATAAC<br>TTTGTGAAAAAGTT <b>GTATAC</b> GACGCTTCGTACCGCTTAAATGTTGTAAGCATTACGATATTT<br>CTCATGTGGTTCCAACCTCATCTTCAAAGTCCCTAAAGTTGCTCATAATACTGAGAAAGAACC<br>TCTTCAGCCCTCCGGTACAAGTGAAACAGCATTCT <b>TATCCCA</b> TCTGCATTGTCAA                                                                                                                                                     |

|    |          |          |     |   |                                                                                                                                                                                                                                                                                                                                                                                                                                                                                                                                                                                                                                                                                     |
|----|----------|----------|-----|---|-------------------------------------------------------------------------------------------------------------------------------------------------------------------------------------------------------------------------------------------------------------------------------------------------------------------------------------------------------------------------------------------------------------------------------------------------------------------------------------------------------------------------------------------------------------------------------------------------------------------------------------------------------------------------------------|
| 5  | 26303795 | 26304223 | 429 | - | TTTTCTTC <b>ATATATATATAT</b> AGCTCACACTATT <b>TAT</b> AGAGTTTGGTGCTTAATTATTGTATT<br>AAATGCTTACTCCAATTACAGCAAGTGATGTTTTAGAATTTGTAACATAATTTAATTTCAACT<br>ATGATTATCGTTTGGAA <b>TAT</b> AGGTTTTAGGCATATGAAATGACATGGCCAACTTTGT <b>TAT</b><br><b>A</b> CAAAAACTTTCTAGTATCGCATTTCATGCAAAAGAATTATTCTGTCCAGACATAAACATT<br>TATGATAATATTTGATTATTTGGTCAAATTTGTGAAAATTGACCATCCATAATTTCTAAAATG<br>TCTTTTTTTCTTAAAAAAATGTTATG <b>TAT</b> AGATTTGCCTTGAAAAATAATGTCATAATAGCC<br>TGAACCTTAGATTT <b>TATA</b> AACTATTCTTGTA AAAAATTGATGGCCAAAGTTTCCAA                                                                                                                                                   |
| 6  | 26777727 | 26778264 | 538 | - | TTTGTCTTAGATAATACTCTTTAGATCTAATTTTGACAGCTAAATATGTTTCATTTTTTT <b>CTAT</b><br><b>AC</b> GACTGAAGTAGTTGTAGCAACCTTTAGTTTTAGGTTAATTTTAA <b>ATATAA</b> TCATCACA<br>ATCTAATTAATAAGATTAAAAAAGATATTTTAAACAGTTTATGCACCCATCTGGAATGAT<br>GTGATCTATTATGCTCAACAACATCTTTATTTTGATTACT <b>TATATAA</b> AATTGAAATAATTA<br>GACTAAGAAGCTGAATTGCT <b>TATATATACA</b> ATTAATTATGTATGAAA <b>CAAA</b> TATTTTTTT<br>TATTAATATGTGGATTAGAAAACCAATTGTTTCTTTAATAAGTTTGATCGTTGAGTTGTG<br>GCTTAAAAAATCTCGAGACAGTCATCAAACCGATTACCTATTTGTTTCAATCTCTATTTCAT<br>CTTGTCTGTTTGCACCGCGTCGATTAAAA <b>ATATAA</b> GTCAAAACTAAAACCTTTAAAAAATAA<br>TCATATGCCCTCTTCTCCTCATAATAACCAATGGCTTTG                                       |
| 7  | 28002899 | 28003459 | 561 | - | TTGTAGGTGTTTATGTTTCGATGTTGTAAATTACTTTAGAATTTTGTGCGTTTTAGATTTTA<br>CGTTTGGAGCACGGTAACACTAGATGTTTGTGTTGCTTTCACACCTCACTTTCTTTTTTTTC<br><b>CATTATAT</b> CAAATTTG <b>TATTTAAA</b> ATTCTTTTAGTGTAGTAGGGTTTTATGTTTGATGTT<br>GTAAATTACTTTAGAATTTTGTGTTTAAAG <b>ATTATA</b> TTTTACATTTGGAGCACGGTAACA<br>CTAGATATTTGTATGCTTTCCACCTCACTTTCTCCATTTTGCCATTCTATCAAATTTG <b>TAT</b><br><b>TTAAA</b> ATTTCTTTAGCGTTGTATGGGCGTATGTTTTGATGTTGTAAATTACTTTAGATTTTTT<br>TTTGCCGGTTTAAAGATTTTACACTTTGGAGCACGGTAACACTAGTTATTTGTTTGTCTTCCC<br>ACCTCAGCCCTTTGGATCATCCATCAAAGATTTTCTGTTTCCAACCCCCCCCCCAGCCCC<br>CTAAAAAAGAAAAAAGAAAAAACAACATTAACAAGAAGTGATAGCTCTGAA                                            |
| 8  | 28409073 | 28409656 | 584 | - | AAACAAATACGATCACGAAAAATTCTTGCAAGGTGAAAACATTTGAAACCCAGCTCCCAAA<br>ATCAACGAGTATCATCTACTTGATACAATTTAGGTCAGAGCTAATCTGCTAAATGTACATAG<br>AGCCTGAAGATTATGGGGGTATCGGTTTGTAGCGTTACCGGGGATTAGAGAACTAATCTT<br>CAGGAG <b>TGATTTTACA</b> GTTTT <b>TATA</b> AGTACTAGGAGGTATCATATTTATTGTAGCGTAAA<br>ATTTGGCATATCTTGATACCTCCGATACCAGGTCATATGAAAATTTACACAATTTGATATCT<br>TTCGGTATCTCTAAAATCTGTAATAATCTCAATCTTCAGTTAACTGTGAACACCACATGGA<br>TCACACAATTCAAAGCGACATAAGAGGTCGGCTGAGCCCGGAAGAGTGAATGAATGACAG<br>AAAAGTGTTGAGCTTAGCGGCAGCGGTCCCGTTTCGTAAGACCGGGATCAAGAAAAACG<br>ACTTTTTTTTTTACCCCATCAAGCGGTTGCAATCACGCCAGAGAGCGCGCCCTCCGGGCC<br>TTCTCTCGCCGCCGTCGTGTT <b>CGTCAT</b> GGC                      |
| 9  | 28832481 | 28833057 | 577 | + | <b>ATATAT</b> CTTCCTTGACCCTTTTTGTTTTACAATTGAGGGTTGTAGTAGTATTAATTATTT <b>GG</b><br><b>ATTTTAAAGT</b> GGGATTTGAGAAGGTGCTCTGTATGTATCTACGCGGTGTCGGTTTATTAA<br>GCAACGAGAAAGAAATATTGCTTACAGATGCTGATATGTGGGATTGTCCATGTTTCGATGT<br>GCATGACTGCAAATGAGCTCATTTTTGTGCTGTACGTT <b>TATAC</b> CTATGTGGT <b>TATCCCA</b> AAGA<br>TTACCG <b>TATA</b> TGATATGTAAATTCTGCACATACATTTTCATATGCAGCAATTCAAATGCTCT<br>ACCTATGTCAATTATCGGGAATTAATTAACCAGATGGGGAGAAGCAAAACATACCATGATAC<br>CGACGCAACTGAAGATCGTGTTTGTGCGGTTGGAGGATCAGTGAGGCACACGCACGCGC<br>CGGGATCCATACCGCCAACGGCGCCACCGCGCAGAGAGCGGAGATCTCGACGAATCCC<br>CCCCGTACAGCAAGCCCAGCCACGGCCGCCGCGACGCTCCCCGAGTTCGGAAGGCCGCT<br>CGCCGCCACCGCGACAACCGCGTGGT |
| 10 | 29559166 | 29559731 | 566 | + | ATCCCATCAGGGATGAAAAACAATTGATTCTATTAATGCTTTCCTTCAGTGGAATGACTTT<br>TTCGTAGAATAGCTTGCTTCTTAAACCGCGCTATTGTGGTCTGGTTGAATTTTGCTCCTTTTA<br>CTTTGTAGCCAAGGGAGGAACTCAAACGGAAGAGAAAGATCACCTACAAGTAAGGCTGG<br>CCTGACCATAGTTGTACTAAAAAATGCATTT <b>TATAC</b> GCAGTATTGCCAATCAAATTTAG<br>CAAAGAAAAACGGTTTTTCTATGTACGAGCAACTGAGCAGCCGGAAGGAGGTTTTGGTGGA<br>ACAGCGACACCCGGCTCCACCCACGGGTTCCGAGAGATTCTTTGGCGGTAGGTGATCC<br>CAACCAACGTCGTCCAGGCCCCACCCCGCAGATCCACC <b>AAACCA</b> CACACGGCCGTCGCTGA<br>CTCACCGATGCACCATCGCCAACCGTACTCAGCGACCCCGCG <b>CGTCA</b> GTGGGCGGATCGG<br>ACCGACGAGCCGCGCTGCTGGGTGCACTGTGCAGCGCCACCCCGCGACC <b>CACGTG</b> TTCC<br><b>CGTCCCCGCCCATGCT</b>                        |
| 11 | 29561875 | 29562462 | 588 | - | TTTAATCTTAACACCGCAAGAAATCAGTGAAGAAAAGCAGCATGCCTTTTAACATCACATAC<br>ATGTTAAAGATCGGGTGTGTTAAGTAGGGGCTCTTGCGCACAAGGCTACTCGGAATTGAG<br>CTTGACACCTCTGATGCGAGGGATTGAGCAGTGAAGTTCACCTAAAAAT <b>GATTATA</b> ACGA                                                                                                                                                                                                                                                                                                                                                                                                                                                                             |

|    |          |          |     |   |                                                                                                                                                                                                                                                                                                                                                                                                                                                                                                                                                                                                                                     |
|----|----------|----------|-----|---|-------------------------------------------------------------------------------------------------------------------------------------------------------------------------------------------------------------------------------------------------------------------------------------------------------------------------------------------------------------------------------------------------------------------------------------------------------------------------------------------------------------------------------------------------------------------------------------------------------------------------------------|
|    |          |          |     |   | CACGATGTTTTAATATCATGATCCAATTTACATCAAGCACACAAATTTTGCGCCGATTGAA<br>TGATTACTTACTGGCTTGCCACCATTGAACACCTTGAACAGCTTGTGACATCCTCTAAGGT<br>TGTGGTCTCATCAAAGGCCACGGTTATCTGCAACATCACAGCTTGAATTTAATGCTCAACAC<br>TCAACATCAACTAACTCGGTTGCAATAGAACGGAATGTCAACAGAAAGCGAACCGTGG<br>TTGCATCAACAACACGAAGGTTTCATCTGTTCTTGACAGGCTCCTGGGCAATCGCATTGCA<br>TCAGCGACCTTGACCTTGACAGTGTCAAAGAACGGCAGTTCCTGCACAGTCACTGTTCCGA<br>GCTTCTTCAGTCCATGGGCAAAGGTACCAGCCAGGCC                                                                                                                                                                                           |
| 12 | 29593372 | 29593947 | 576 | + | ATATTGAATTATTGATGACTCGCTCTCGTGTTCAGACGACCCCAAGCGCCGATCAAAATCT<br>GTTTTTTTTTTTTTGTGCTGATGATCTTCCATCTCGTTTCTATTTGAGATACATATATGTCTTC<br>CCTTCTGTCGTATGTCTCGTACGAACGTATCGTATCCTACCCAAAATCCTGTTCTAACTGGTA<br>AGTCCGGCACTTGCATGAATACATCTCTCGGTTCCGGCGTTCGGCCCTTTTATCATGCGTG<br>AAACAGAGTCTGCGCGTAGGCACGCCAAAATCCCTGTCAAGATCTCTATAGCTTCCACGCT<br>CCCATCAAGCTGAATCGATCTCCGACGAAGAAATTAGCCGGACATGGCGAGAACAGCCCT<br>GTACGGCAGCAAAGAGGTGGACCCCTTGTGGTGCTACAGACCAAAGTCATAATCCTGTTT<br>TATGGTATGGTGACGATAGTTTTAGTGCTGGGGATCCCGGCCGCTGCCCTTCTTTCAACGC<br>CGCCGAGAAGGTCAAGTACACCTTGATCTCGCCGCCGTGAGGGGATGGACGTCGCCGC<br>CGCCGCCACGGCCGGCGCCGG      |
| 13 | 29594054 | 29594586 | 533 | - | TACCAAAGTTAAGTGACGACTTTCGATGCAACAAAATTAaaaaacgaaaacCTTCAATGCT<br>ATAAATCAAATGTTATTACTCCATATCCTTACCAAGGAATAATGTTTTCATTCTATTTACT<br>TTGGAGATAACATGCTAAAAATATGAATTAATATATATGTTTCTATTTGAAAAAGGAAA<br>AAAAGTTATGATACCAAACAAGAAAACGTGAACAACGAAGAAACAATATCCATCAGCCTT<br>CCCTTGACCAAATGTTATTCATCTCTTCTCCAGCGTAAGCTCCTGTGAAATCCCCACCAT<br>CCCAGTGCTAGGCGGAAGGCAGCCATAACGAAATTAGCGTAGTAGTGACGTTTCATCTCG<br>ACGTAGACCTTAGCCGTCCCTCCTGCAGCTCTGAGACAAAGCGTTGCGGTAGCTCCTGCG<br>ACAAGTGGACGTTCTTTCCCAGGGCACCACCGTCAAGCTTGGCCGTGACCTCTTCTGCACG<br>CAGAATCCCGGGACGCGCCCCACGCGAGCGCTACGCCGA                                                           |
| 14 | 29655728 | 29656263 | 536 | - | GTGCTGCTGCTGAGAGGCAGACTACAATAGGATCACCCTAACCATTTATTTATCTGTTAT<br>TTAAGAAATGTTATTGCTTTACAACCTAATTTCTTATCTGAAACCAAGGCTTCAAGTTGATG<br>CCATTTCAGATTGTCTTCTTTGTTATGAAAAACAAGAAAGTATGCGGCCAAGAGAGC<br>TCTTACTGAAGCTCGTGAAGAAACGAAGATCTACTGAAGAGAAATGAGGACCTCCTCAA<br>CGGAATGATGACTTGATTAAGAAAATTGAAGAGTCTAGCAAACTATTACTCAACTTCAAG<br>AGACCTTACAAAGGTGCATATGCAATTTTTATTTCTTATTTTACCTATTTGTATGATGGTA<br>TCAGGCTCACTCTATCATTGTCAACTTCAATTAATAACTTTTTCCATCCTTCGTAAACAG<br>GTTGGAAGGAAAATCAACGAAGTTAGAAGCTGAGAACCAAGTTCTCGTCAACAAGCAAC<br>TGCAACTCCACCATCAACAGCCAAATCTTCAGCTTCACGCTC                                                            |
| 15 | 29682929 | 29683518 | 590 | - | CATTTTTAAATTCGAATACATGAATCCCTGAATTCATCTACCTACACAAATTTTTGACAGG<br>TACATCTTTCCACCCCAATCTGTCAAGTTCAGGAAGGGAATGTATCAATCGCATGAACAAG<br>AACAACCCATGTCATCTTCTGCCCTTCCAAGTTCCAAACCTTCAATACGACCCCAACATC<br>CATCCACCAAACCTTCTCCTCCGCGAGTTCCACGACTTCTTCCATGGGTTTCCACTCCACCAC<br>GAGACAAGAATTCTGTCCTCCTCAGATCCAGATCCAGCTGACTGAACAAGGCCAAAGCAC<br>CGAGCCGGCGAGCCCGCCGACAGTAGCTGCAGCAAACACGACGAGGAAACCAAGCGGGG<br>CAAGGCAACCAAAGCCAACAGCCAAGCAAGGCATCCGCTCCGCTCCGCTGCCCTCACGC<br>CGGCCGCGCCTCCTCCCCAAAAATCCCCACCCAAAATCCAAAACCTCAAACCTCCTCT<br>GCTGCTATCCGTCCATGTCTCCGCTACCTCGTCCCGCCGGGGGCCGCCGACCGGGC<br>GGGGGGCGACGCCGGGGACGCGGCCCTCGCGCGCG    |
| 16 | 29854966 | 29855558 | 593 | - | ATATTTTGGCCGTCTGTGCTTTTGCTTCTTCAGAAAGCGAGCAACCGTTCGTTGGCTGAT<br>GATGGTCCATTTTTAGTGTTATTCGGCCCCAGCTCTGGTCTTGTCTATGTTTGTGATTAT<br>GTTCTCTGGTCCTGTTTCTGAATTTGTTCTTTTCTCTAAGAACATCTTTGTGAAAGTTTT<br>CGATGTAGTAGATGTTACAAGGCATGTACTGTGCATGTCCAAGTTTATGTCGCTTTCGTG<br>ACATTAGAGCACGTACAATGCCTAGCCCTAGGTCAATCCCTGGCTCACGCCATCGGCCTCC<br>ATTGCCTTTCGTGCGTTTGCTCGCGGGGGACGCGCCCTTCGCCCACTTTTGCTAAGCCACG<br>GAGCCGAGCTCTGTGTTGGGCGCACAGTGGCTACCAATGTAGTCTATGGTCACTGCTCCA<br>CCCCAAAATTTCCAAACGACTCCTCGGGACTCTCCACTCTCGCCCTCGTTTCTATCGACC<br>TCCTCGCGGGCCCTCGCCTTCTCACTTCAACGGCCGAATCGTCTGTCGTCCTCCGTGAGAG<br>CAAGCTTCGGGGAGGGCAGATCCACCGTCAAA |
| 17 | 29915311 | 29915908 | 598 | + | GCAGAGAAATCAATTATGAAAGAGCTAGTAGTACTCCCAATTTCTTTTCTGCAAAAAAGA<br>AAATAATAAATCTGCACACGTGTGTGAAGAGCTACTCGTCGTTAACAGCGGATGATCTT<br>TCATGACTTGATAGATGGTTGTTGTTAATTTGTTGACTGTGCATTGTGCTAGCATGATTGGA<br>ATGTTCAAGATGAACCTAGCTAATTTGATAAATAAATGGTGCCCACTAACAGTACATGAAG                                                                                                                                                                                                                                                                                                                                                                      |

|    |          |          |     |   |                                                                                                                                                                                                                                                                                                                                                                                                                                                                                                                                                                                                                                          |
|----|----------|----------|-----|---|------------------------------------------------------------------------------------------------------------------------------------------------------------------------------------------------------------------------------------------------------------------------------------------------------------------------------------------------------------------------------------------------------------------------------------------------------------------------------------------------------------------------------------------------------------------------------------------------------------------------------------------|
|    |          |          |     |   | GTGAAATGAGAACGATGCACCATAATTTTTCCCGAAAATGTTCTTTTCTTTTCACGAAG<br>ATATGCAATCGTTTGTGCACAATACTAGTACTACTAGCACTATTACCTGCCCGGATACTGC<br>GTCACTCACCATGCGGCATACCAGTTTTTGGACGGAACGGCGTTGCCCTGCCGCGGAGCGT<br>GGCGTGGCGCCGGGGTCCCCATGGCGAGTTGGCTTGGCCCGGCCGACGGGGGGAGCAT<br>TAAACCCCGTTGGCCTCTCCGCCCGAAATCCCGTTGCCCCGACGGAATCCGGCAAG<br>GTAGAGCCCGCGAGTGCACCGTGACGCGCACCAGCGACACGCTGACC                                                                                                                                                                                                                                                               |
| 18 | 29924963 | 29925542 | 580 | - | GTGAAATTTAAATTGGCGAAGATAACAGAAGTGTGGAGAGTGACAAATGACACGCCATAGC<br>AAGGAAGTTCCATGCAATGGAGGTGATGAGATGGGGAGGTAAAACGCAAACTGAAAAA<br>GAAAAGGCAAAACATATCTAGCAGGAAGAATTTAACGGAACACGCTATATAAGGGAC<br>ATTAATAGGTGATGACGATGGCGAACTATATCTAGGGATGGGTAAAAATTGAGACAAAAA<br>TCAAACTGAAAACCGAGACCAACCTGAAAAACATAGTATCGATCATTGGTCCCTAAC<br>TCGGTCTAGGTCTCATGTTTACAGGACCAATTATTTGATTAGTTTATTGCATCGGATACTTG<br>AATTACCGATCTATTCAAGCCTTATCCTAATCCCCTCCTCATTATCAATATATCCCTTCCAC<br>TTCCTCATCCACGATAGCACTTGACGCTCTCGTATGTTATCTTGGCGCTCCTCTCCCCTCCT<br>CACCTCAGAACTTCTTGAGTGGACCTCTCTGGCTAGAATGTCTCATGGCTTTTGTCCCTCAT<br>TGGCCACCGCTGCCTCAACGGCAAGGTGCT          |
| 19 | 30206231 | 30206772 | 542 | - | AGTTCATTGCTGAATGGGTTTGAGAAATTAATAATTTGTTTGCAACGGAAGAATTTGAAGG<br>AATTATGAAGGATTTGCGTTGTTTTTTTTTTTGTACTACAAAAAGTATCAGTATTGCAAA<br>TTGGCAACGCCATTCAAATGGTTGAGATGTGTTCAAGAAAGGGTATCTGACATGATGGACA<br>CGCATTTGTGTGTGCAAGACTGATGAACATATGAAGTAATTTGGTTTGTAGGATGACTTCC<br>AAGTCAGGGAAAAAGGAGGCGGCATCTTTGGCTTTTGACCATACTTATCACAGTCCTGT<br>GACGATATATACAAAGGAACAAACATACCATAACAAGAAAATAATGTTTGTTCGAAAAAA<br>GACCAATCGTTTTCTGGAATGGAGAAGAAAAGAAAAGGAATCATAAAGCGAAGGAC<br>GGGTATCTCTAAGCACATATGTACGTGCCAGCGTCCACCACGCACAAAGGAAGAAG<br>GCGAGATTCTCGTCTCAACGAGAAAGCTGATGTCTACACAAGAACTAAGCCAGA                                                         |
| 20 | 30556057 | 30556605 | 549 | - | ATGTCACATAAGGAAGAGGTAAACTCGATATATTCGATCACACTAACAATGAGTTGACTG<br>CAAATAGGTACAAAGAGAGCTATAGGACAGAATAGCATAATTTATTAAGCAAAAGAACTG<br>GAGTTTCGTAGTGCACAGGACCTTCATCTAATGCACTAACTAAACATACAATTCCCAAGCC<br>CTAAAGTCCTAATTTTCATGTATTATTCCTTCCATCCTGAACTCATGAAATAAAATGGGAAA<br>ATTTCTAGCATGCTCTCGAGTTTTACTCAATCCCTCCATGTTCTAAGAAATGTGTGGTCCC<br>CTCATGTCAATTCATCACCTCCTCATCGTTAACCTCCATTATATCTTTCAATATGGCCAAA<br>TTGCCATGGCACAGTGCATTGGCTGACGTCCAAGAAAACAAAAGGGAACAAGAGAAAAG<br>AGAGGAAAAGCCCATGAGGAAGAAGAAACACCTCACTGATCACTCTTAGGTGATAGAATAG<br>GCAAGCAAATAAGCTTGCCAGTCAGAACTCAGCACCTTAAACCTAAAGGCATAACGATT                                         |
| 21 | 30557486 | 30558071 | 586 | - | ATGGGGGGAAATAATCAACAATAAAAGAGTATCATTGCTTGAGGTTTACAAAACAAATCA<br>CATAAACTATTGACGTAATAAGTGATAATAATTTTGGATCAGCAGATCAATTATTTTTAT<br>GGTATACACAAAATATTGGGTATTTGTGCATGTATTAAGGAACCTGAGTTTAGAGAAAAAC<br>AACCAACTGGATGAAGATCAACCAAGAAAAAGGGGGAAAAAAGGGAAGAAGATAATCCA<br>AACTGAAAGTCTCACATTTTTTTTAGACCAGGAAAAAGAAACACCACTAGGTAACTCCTG<br>GATTGTTGCTCCTGTCAACCTACAATGCCGCTTCTCCGCATAGATAGTTGGCACCAGGGCT<br>TGCTGAGTTGGTTGAAGTATTTCTCTCTAAATCATCCAAGTCACCACTCAATGGTATCAA<br>GCCGAGCTGCAGATGCTTCAGAATCTACCTCTGCCAAGAGCCGCCAACCTCAAAATTGTT<br>CTAACTGCTTGAGAAGCAGCTTGTCTGTACTCAGGTTAAAGGCACTTAGAATTAACCACCG<br>AACCTGCAGGGATTCCGGGAAAGACTAAGATGTGGCCG |
| 22 | 30810940 | 30811525 | 586 | + | AGGGAAGTGAGGTTGTTCTTTTCTTTTCAGTACGTATAGACAAGCAGTGACGAAACCAAG<br>ATCTTCGTACGCCTAGGGCCCAAATTAAGCTAAAACTTGCCATGACAAATGTGCGGCAAAG<br>TATAGTACAGGATGGAAAAAAAACAAGAGTAACTAAAATTAGGCAACAACCACATTTGG<br>TTTAAGCACATAAATCTTGCTCATTGTTACTAGCCATGGTTTCTACTGAATTAGGCACTG<br>GGATGGAGTCATTGGTTTCTTCGGTTTCTAAGTTGCCGGGGTGGATTCAATTGAGGACTG<br>AACTATATTGTCCTACTTCTCTTCATCTACTAATTCAAACCAATCTAATTGAGTAATATGAT<br>GTACTAAAGCTATAGGTTTGAGATTTAGATTGAGAAAGTGAAGGAAGAAGAAAGA<br>GAACAAAAAATTATTGACCTTCCACTCCCGCACGACGCCAGTCCACCGCACGCCCGCAC<br>GGACCGCACGCTGTTGCCTGCAGGCTGTCGCTCGTGCAGCTGCGCCCCGCTGCCGCAC<br>GCCGCTCGCACCTCCCCGCCGGCCGCCACCTATCGA           |
| 23 | 31133856 | 31134440 | 585 | - | GCACTGTATATTGTTCTTGTAACCATTTGTTTCAAGGGTATGACGCTGCTGGCCGGGCAGCT<br>ATTGGAACAACCATCTTAATCACGCCTTGGTACTTACTGACCCTTAAGGGCAATGCCAGTT<br>TTAAGAGACATCTACATAGAAAAGTTTGCAATGAACCCTGCAACCTACCGTCTGGAATAT<br>GTTAACTATCAAATCAATGTCGCTGTATGATAGCAAGAACACCTTCTCTGTTAAGGCGCCT                                                                                                                                                                                                                                                                                                                                                                         |

|    |          |          |     |   |                                                                                                                                                                                                                                                                                                                                                                                                                                                                                                                                                                                                                                                     |
|----|----------|----------|-----|---|-----------------------------------------------------------------------------------------------------------------------------------------------------------------------------------------------------------------------------------------------------------------------------------------------------------------------------------------------------------------------------------------------------------------------------------------------------------------------------------------------------------------------------------------------------------------------------------------------------------------------------------------------------|
|    |          |          |     |   | GATTAATCTTAGAGCATGTGCATTGTTGAATTTAGAGAGGGTTCTATAGGAGAGAGAGAA<br>GGTGATAAGGCCGATTCTACGCATTGCAAGATTCTCCCTGTTGAATTTAAGCATAGTGACA<br>GGCATCAGTGCTAGTGTAGAAAAAAGTATATTGGACCCGCATGTCAGATATCATTGCTCCC<br>AGAAATAAAGTGGCCAATCTCTATTTCTTTTTTATTACAGTGGTCCCAATTAAGAAACAC<br>GTGGTCCCAATTTGATCGGCCTGAGCTTCGCACCTCAGCGCCAAGGCGTTTGGTGCTGA<br>CCTTCGGCTCTAGTACACCTTCACCGCGAGGGGG                                                                                                                                                                                                                                                                                 |
| 24 | 31415775 | 31416350 | 576 | - | GAGAAAAAATGATAGGATGCCGGTAGGAGAGGAGGGCGCTGGCAGGATAGTGTGACG<br>ACGACGAGAGGATGCCGGCGGGAGAGGCGGTGCGCGCAAGACATCACCGGCGACGAG<br>AGGCGGAGGGAATAAGTAGGAAGGAGGTGGTGGCGGCTAGAAGGGGCGAGGCAGCGA<br>GAGCAGATGGATCTTCATCTATGGGCGGCAGCGACGGAGCTTCATTGCCGCGAGCACCCC<br>GTTGAGACCAACGGCGCCCCACAGCCGACCCTCGGCCTACTTTGGCTTCGTCTGTCGACGCC<br>GCCCCACATGCCACCCTAGATCTGCCTTGCCTGGACCACCTAGGGACCTTCACCACCACCT<br>CATCAACCACCCACCGTCGGCACAGCCCTCCACTGACCCCGTTGCCTAGCAGCCAACCCAC<br>CTCCGTCGTCTCCATCTCAGACTCTCCCGGCGCGAGCTCGCGCTGGCCCTCGGCCCTCCACT<br>GTCGGCCGCTCCACTCCGCCGCTCTCTCGGCCCTCTCTCGCCAGCGTGGCCGGCCGCT<br>CTCCCTCGCCAGCTGCTCTGCCACCGCCGCC                          |
| 25 | 32105302 | 32105851 | 550 | - | GGCAAGCAGCTCACTGAAGCATGATAGGAAGATAAACATAATCTAGCTAAGCATCATCTTA<br>TTGTTGTACGACGTCAGAGTGTAGCATTATATTGCCTAGTCACAAATAAATTAAGAACTT<br>AATTTAGAAGCTAGTAGCAAAGTAAATTCGAAGAGGATGCTGAAGTACCCAGGAAAAAGT<br>ATATTGAGGCTAGGAAAGGATCAGCACACGTTGCAATTAATTGTGAAATTGTAAAAATG<br>CAGCAAAATGATTTTCGATCCATTTATTAATTAGGTCAAAGATACGTATAACCGTACCAACT<br>GATCAAATTGATGATCAGATTGACATGTGAAAAAGGAGGATCAATAAATTATACTCCTAG<br>TATATGTATTGGGGCATATATGTTTTCACTTGATTGATAAGCCGGCTAATCCTATATAGC<br>TTAAGAAATCATCAATTACTATGTTTTCTCATACGTATTATTGTCAAATTAATATATATGTC<br>AATTAAGTCCCAAATTAACCTTCTCAGTCAAATTGATCTGCTCCTCACTAATTAATTGCCA<br>A                                              |
| 26 | 32194446 | 32195041 | 596 | - | AGGGGTCGTTATTTGATTATTTTCGTAGGCAACGAAAAATATATTATATTTAGTATTCAT<br>GGAAGCTTAAATAGGACAACTATGCATATGTGGCTGAATATCATTTTGAGAGTACGCTG<br>TCCTGATCCATAACTCCATATATGCTACATTGTGCTTAACCTCTGCCTCCAATTCCTACTCT<br>GCTGAATTTTCCTCTGCAAAGTGCAAAACAGGCAGGAGATCGTATTAGTTGCTAATATGAA<br>ATTAACAAAATTCTAATTTTCATGCAAGCCGTCGCTATGCCAATTAATCTCTGACTGGAT<br>TACGAGATTAATTAACCTCGTCTTTTCAGTCAAAGTCTACAATTTCCAAAACAAAATCAACA<br>CACAAACAAATTGTCAAAGACTCAGACCTTGAAATAAACGACTGCTTATCTCTGGTCAAGA<br>AATCGCCGGAATAACAAACAAACAAACAAACACCGGGAAAAATATATAAACAATAAAAGGGAG<br>AATGCCGATCGAGCTAGCTCGTGCATTCCGGTCCAAAACCGTTGGCTGCTCGACCGAATCA<br>CCTACCGTGAACAGCCGCTCTCTTTACCTTCAAGCCATCTCC |
| 27 | 32402570 | 32403152 | 583 | - | AAAAGCATATTTGTCCGTACAATGCATGGCTCCCCTAGTTTTGTATTATATGATATGAAA<br>AAAAAAACAATCGGGTAAAAAGAATAGGAAAAAAGAACCATTAGTTTCATATTATATGA<br>TATAGATACCCTTTTAAATAATATTATTCTGCTGAATAAAAAATGAAGGGAGAGCTAGCAG<br>AGGGACACAGTCATTAGGGGATACGTTAATCACATAAGGAATTTCTTAATTTTTATCAGT<br>AAGGTACAAAAATTACTAATGTAGTAATTAACCAATTTGTAAAAAATTGAGATGTATCTT<br>TTTTTTTCAATAAGGAAATTCCTTGAGTTTTTCATGCGTAGTTTGCTCCAAATACTTCCCG<br>CCAAACTCAATTTCCCTCCAAGTAGTACCGCAACATTAGATAACAAACCTGCTAATCTCTCT<br>CCACATCTCTCAACGAATAAGCTCCCTATATAATCCCATTCACCTGGAATCAGTTAGT<br>CAGTCTTCTGCTCCCCATTATCTCTCACCAGAGCACTCTCCATCGCCTCCTAAGATCGCA<br>TTCTCAACTGCTCAGCCGCGCAGGGC                         |
| 28 | 32574618 | 32575198 | 581 | + | GTACGTTTGTATTGCAAAAAGTAGATCGAGACAGTTAATTTGTTGTTTCATGGTTATCATG<br>GTAGTAGTTCGAAGGGACAAGAACTTCTATGCACAAACGTAATCAAGGCCATAATTCGGT<br>TGAACTGATCAAATCAATCATCGACTCCGATACAACTGATCGTTTGAAATTATCCCATGC<br>CGCCAAATCGCCAATACGGCAATACCACGGTAACAAAATTAACCAATTACAATAACTAAA<br>CCACGGGCAAGCCGACGAGTCGGATCCTTGCTCATCAACGTAACCTTACAATAATTAATC<br>TGTCAGGAACGTTCTGGCAGCGTAGGCTGGCGAGGTGACTTCGTGCAACGCCTTACAGT<br>CGATGTCGAGCACCAGCGCGCCCGACGAACGCGAGGCGCATGCGGCCGCGGAGG<br>CGTCCGACAGCCCCACGCCCTGGCCCCGCGCCACCACTTACAGTCCCTCCCGCCGCC<br>CGCCGCGCAGTCGCGCGGCTCCGCGTGCGCCACCCGAGAGCCACGCCGAGTACAGCAC<br>GGTCACGGCCGCGCGGTGACGACGCGCCGT                                 |
| 29 | 32944583 | 32945178 | 596 | + | CGTGTTGCGGCAACAAATCAAATTTCTGCGAAACGAACAACATTATAACCGGCCGGCC<br>GTTAGATATATATTCTGCGATTTCATTTCAATTCATTGTTTAAACAATAGCAAATAAGTTGA                                                                                                                                                                                                                                                                                                                                                                                                                                                                                                                        |

|    |          |          |     |   |                                                                                                                                                                                                                                                                                                                                                                                                                                                                                                                                                                                                                                    |
|----|----------|----------|-----|---|------------------------------------------------------------------------------------------------------------------------------------------------------------------------------------------------------------------------------------------------------------------------------------------------------------------------------------------------------------------------------------------------------------------------------------------------------------------------------------------------------------------------------------------------------------------------------------------------------------------------------------|
|    |          |          |     |   | TCTGCGAATTTGCGGGGCCATCATCCAGTTGGCACTTGAACCTGCGCATGTTAGTTTTCCC<br>TTAACAAACCAAAACAACAACCTGCTGATCGTTAGAGCCGGCCAATCACCCAGCTATAC<br>CAGCTGCTGCTAATCATAGCAAACCTAACAAATGCCCCAGCCTGTGAAAGGAACTCCCAGCC<br>AAGCAATCCATTCTTTATTTCCAAGGCGACCTGCCCTGCCTAAACAAAGCACACATGCAACG<br>CAAAAACAGCCTAAAAGCCTCCCCGATCGCAGCTATATATAAACACGACCTCTCGCTCTTC<br>TTTTCATCCCAAATTAAGCACCCCCCCCCCCCCCAAGCCCTCGTAGCTTTCTCGTTAATTCT<br>CCGTTGCCAGCATCTCAGTCGATTATAGCTAGCGATCGAAATGGCGGCCACCCTCAAGC<br>TCAGGATCCTCGCCGCGCTGCCACCGCCGCGTCTGGCGT                                                                                                                      |
| 30 | 33236531 | 33237113 | 583 | - | AACTGGCAACAAAATCAGAGGATTTCTGAACTATGGACAAGATGGTAGTATTACAATCCCA<br>AAGAGTTGGGATGTGAGATTATATAAGGGAAATTTGCTTGCTAGTCAAAAATAAACAATTTT<br>GCTTACCAGTCAAAAACAAGAAGGAATTTCACTTTGCAAGTGCATGTATACTGAGATACGG<br>ATGAACAGATCAAAATATCAGATCATATGCCTGAGATTTTTGCTGCGGAGACGAGGAGTAC<br>GACGATGATGCTGGTATGACACGAGCGGCTGGGCGACCCGACGAGCGGCGCCATCGCGG<br>GCAGCCGCCGCTCTGCTCCTGGGCTGCCGCCACCGCCGAGCACGACACCGGGCT<br>GCTTCTCGACGGCTGGGCACTCGAACGGGCGCCGCTTTCGAGTCATGGAGTGGATGTCG<br>TATTGGGAGCGGATGTGGGGGCGAGGGCTGGCGGACGGACGGTGGCCACCTCGACC<br>TCGCCGGCCGCAAAACCATCGGCTGAAGCCATGGCAGCGACGGGCGCTCCACGCCTCCC<br>TTCTCCTCGCCCTTCTCTTCGATGTCGCGGGCCGCGCCGTCC |
| 31 | 33285904 | 33286481 | 578 | - | TTACAATTTTACCATCTTCTGTTTAGTTCTTTGCGTGAACAAACATACTAAATGGGTTCAA<br>TGTTTTTTTAAAAAATTATGAGGTATTGAGGTCAATTGACAGGGGCTTATAACCCGTATA<br>CTTCAAAATACGGAGTACAAATGGGATTAGGATGATTGCCATATTTGGTCCATTGGTTGTC<br>ATGGCGATGTGCATCGGTACGTATGGACACTTTGAGTTGGTGGTGTGGTTTATTCTCAG<br>TTCATTAGAGAAATGTTAAGAAGTATGGGCAGGCTTCTAGGAGATGCCATGGCACAGACG<br>ATGAGACGAACGAGGTGATAAATCTGTCTCAAAAAGGCTACCAACGAAAAGCAGCTAGC<br>GATGCAGGAAGTGTGGTGGCGTAAAAGCGTTAGCGCTTTTGGCGGTACCTCCTGCAAC<br>CACGCCCCAAGCATCTTCGCCGGCCAGCCGGCGGTCTGCCTGCACTTCCGGTGACTCGTG<br>TACGAGCACCCAAAGTGCGGTGTGCGCTGTACTGAAAAACGTAAGAAACCCACCCTCATA<br>CACGGTCAAGTCTCGAGGGAAAGGCCGGAG       |
| 32 | 33497786 | 33498313 | 528 | - | GAGGCCTCTTGATTTTTCTCTCCCTATTTTGGATTTCTTTTTTTGTGCGTAATGCAGATTTA<br>CTCTGTTTTACTAGATAAATAAATAAAGCAAAAATTGGAGTAGTTTTCTGGTAGAAATTAT<br>CTTGTTGCGATCCTATGAATCAGTTCAATTAACCTTAGATTACTAGAGCCACGATGA<br>TTGAGTCTCAAGCTAAACAAAAGGCAAGGGTTCTCGAATAAGAACCGTTGATGATCATT<br>TATTGAATCGGTGTAATGACTCGACAAAATCGAGAGAAAAAAGTTGTTTTTGGGCAAAC<br>AAAATTGGAAGGAAGAAATTTTCTCACCCGTAGGAACTACGAGATCACCCCAAGGACGC<br>CTTCGGCGTCCAGGGGTACGGACCGACCATAGACCCTGTTCAATAAGTGAACACATTAG<br>CCGTCCGCTCTCCGTTGGGCAGTAAGGGTCGGAGAAGGGCAATCACTCGTTCTTAAACCA<br>AGCATTCTCAGAAAATTCAGTTGCCGCGAGCTCCA                                                                    |
| 33 | 33500803 | 33501310 | 508 | + | TATTCTAACTCGAAAAAGAAGAAGAGGAAAAAATTGCAATGGATTTAAACTAGAACTTAT<br>TCTTAGGTAAATCCATTGGGAGATGCTTCTCTAGAGTGTCCATATCTGTTTTCCATCTTGCA<br>TACGAAAATGTCAATTCTCATCAGATCTTCTCCGTCTTACTCAAAGGTCCAATAGTGAT<br>GGATATTGGCCCTTTGAGACAATTATACGTTCTAGAAGGCAGTTCTAATTGATCAATAAA<br>AATACACTCAATGGAATCTTTTTTTGTTTTCTTTAGATTAGTTAATCTTTTTGAAAGCTT<br>AAAAGGGGGGAAGTAAACCTGTTTTTATTTCTTGGAAACGAGTACCCTCTTCTCCGTGTG<br>AAGAAAAGGAAGAAATAAATCAATCAAATTACGAGAAGCCTATAAAGCGCTTCTTAGG<br>GGTAAACTTCATTGGTCCATTATTTCTAGAAAAAGTATCTCATATTTGCATTTCATTCCC<br>ACAAGCAAAAA                                                                                         |
| 34 | 33549561 | 33550124 | 564 | - | TAATAAGAAGCTAAAAAATGAAGCCCATGTCTTTGAAATCCAACGATCGTAATGCCTATA<br>AAATGGAAAAATGAAAGAGCCAAAGTAATGAGAAAAATGACTTGCTACTGTGAAGCTAAAG<br>GGTATCATACCTGGGGATTACGAAATAACGAAAAAGTAAAGTGACCGAGATGCGAGGG<br>AAAACTTTTGTTTAACATTTCCACCTATTTGTTGTTTACCAGTTTACGACGAAATCATAA<br>ATAAGCTCTACCAAGGATTGCCATGCATTTGGCACTGACTTTCCCCGCCCTTTTCGTAACA<br>ACTCCAAATAAAGATGGCACCAAAACGACAGTTACCGCCATAGACAAGGATTCATTTGTGA<br>ATGATAAATAAAAGTTACCATATCAAGACCAAATAATGGATCAATGAAAAATTGATCCAA<br>GGGGCTTGAAATTACTGGTCCGCCGCTCCAGGGATAACTATATCGCCGTTCTCCATTCA<br>GCCCCATCTAAACCTCTATTCCGTTCTGCCAGTTATTGAAACGGATACGCTGCGCCCTCTC<br>AAATGGTTCAA                       |
| 35 | 33558255 | 33558845 | 591 | - | CCATCAGTTGATTATATAACCCCTCGCCAATGAAATTAATTCATTTTATGAAGCGAGGAG<br>AAAGAAAGGATCAATCGAGGATCCAATATTTTATTTCCCGGAGGAAGTCTTGTAAATCA<br>TTGATTTAATTTAGAGTAATAAACTAATAAAACCTTAATTAACCTACTCAACTAGCTAA                                                                                                                                                                                                                                                                                                                                                                                                                                         |

|    |          |          |     |   |                                                                                                                                                                                                                                                                                                                                                                                                                                                                                                                                                                                                                                              |
|----|----------|----------|-----|---|----------------------------------------------------------------------------------------------------------------------------------------------------------------------------------------------------------------------------------------------------------------------------------------------------------------------------------------------------------------------------------------------------------------------------------------------------------------------------------------------------------------------------------------------------------------------------------------------------------------------------------------------|
|    |          |          |     |   | AATAAAAAACAGCCTTCAATGGAAGAGTATCCGTTTTTTTTGCAAAATTTCTGTAAGTTCTA<br>AATTGAACTTAATTGAACAAGTCAAGCAATTCTATTTGGTCACAAAAAATTTGTCCCCGCC<br>ATATTTTCTTTCCCTCTTTTTGTCCACTACATCGCCTGAACCTAAGCAAAAGAGGTTCAAGAG<br>ACAGACCCAAATAAAGAAGAAATAGTAATCTTTGCCGAATAGGAAGAAAAAAGATTTCATA<br>TTTCGATACAATAACAAGAAGAATCGACACAAGAAAAAGGCCAAAAAGCCTTTTTCTGTGC<br>CCAATAGAGGATTAAGAAGACCAGCAATCCCTCCTAAAAGGATTTGTTCTTTTATTGTTCT<br>CGCCCTTGCTTGCACTCTCCTGTTTTGCATGAGAT                                                                                                                                                                                                 |
| 36 | 33563432 | 33563977 | 546 | - | CTCCAGACGGCGTATTTTTTAAACGAGGTCCTCGATAACGGGACATGAAGACTCCTTTT<br>TTTATTGAAATTTTCATTTACACAATTAATTTTCATTGTATTTACATTACAGAATACATCGAAAT<br>TAAACTGAATTAAGTAAAGGATAAACAGAGTAAATCTACTAAAAGTACCACAAAAAAT<br>TTGTATATATAATTATTTATTTTATTGTTTTGTATCTAGCAAAATTTAGGGGTAGAACGACAT<br>AATAGATCCTGGCTTCTCCATTTAATTCGGAGAAAAAGAGGTATTTTTGTTTCATGGAACATT<br>GATAGAGAAAAAAGCCGACTATCGGATTTGAACCGATGACCCTCGCATTACAAATGCGATG<br>CTCTAACCTCTGAGCTAAGTGGGCTTACATAACAGAAATAGTGTAACAAATAGAAATATGT<br>ATAGTATAGGAAATCCGTAATATGTCAGATCTTAATTATTAATCTTAGCTATTAAGTATGTT<br>GAAATTGGAAGTTCTACTTAGAAAAAATACTAGAACTTCATAAAATAAAG                                               |
| 37 | 33571754 | 33572345 | 592 | - | TGCATTTTCGCGATTTGTACCCAAAGACTAATTGAAATTGCATCCAAAAACAAATAGGATT<br>TGGATTATGAGTACAGAGTCGCGAAGCATAATTTGCATTGGATTAAGGATTCCAATTTTTA<br>AAATATGAGTAAAGGATCTATGGATAAAGATACAAAAAAATTTATTTCCAATCGTAACTA<br>AATCTTCTTTTGTAAAAAAGGAAATGGAAGCCAAATAGCTAAAAACGGTAGTTTTGGTT<br>TACTAGAACCATCAGCATATTGTTTCAGCTCGGTGGAACCCAATTTCTTCTCAGGATCTCT<br>TAAATGAAATTAGGGAACGAAGTAATTAGATTAGATAGATTTAGGCCAAATTTCTATCTCTA<br>CTCTTAGGGATCATCTAGAAAGCAGAGAGCCTTGGTTCCATTAGACAAAAAAGCTGACT<br>TAGATGTTAAGTGGTGAGAATACCCATAAAGGAGCCGAATGAAATCAAAATTTTCATGTTG<br>GTTTTGAATTAGAGACGTTAATAATAATCAACCAACGTCGACTATAACCCCTAGCCTTCCAA<br>GCTAACGATGCGGGTTCGATTCCCGCTACCCGCTCCAT |
| 38 | 33573885 | 33574443 | 559 | - | CGATTTGATCTATTCAAAAAATATCTTAAGATTCTTATGATATAATTAAGTATATCTATTA<br>TAACGAATATTGACTATTGTATTTTTGAGTTTGCAAAAAAAGATTTTTTATAGTATAGAAT<br>ACTTTTTTTAGAATACTTTAGTATTCTAAAAAAGAAATCGAATGGATTATATAAATA<br>ATAAGAAAATAGCAAAAAAGGAGAAGCAATTAAGAAATTTGATTTTTCTTTCCGATCCTC<br>GCGGCCTTTCTATCTTCTAATCGAATTGAAATTGGATTCAAAGTACGACCTAGTCGAATG<br>CACCTATTTGCAATCCAAATCTTTTTCGTCTACTTCTTCCACATGCAATACTTATTCAACCA<br>CTCTCGGACCCCAAAATCCGCTGTAAGGATTGATACATAGGACTTTTAGTTGATTGATATT<br>GCCGTAAAGTTGAACTTTTTTAGGCTTTTTTATTAACTGTAATTTCTCTCTGCAACGTCG<br>CTCTCTAGAAGCATATACAATAATGCGCGGTAAAGGAGGGAAAAATAGCATACTCAATCA<br>AGG                                        |
| 39 | 33586032 | 33586623 | 592 | - | GATAGGCGAGAGGTGTAAGCACCGCGAGGTGTGAAGCGATCTCGTACTAAACGAATGGA<br>ACTTTCCAACCTTTGAGAAAAGGTCCCATCCTTCAATATCATGATTGGGTCAACCAGGCCAG<br>ATCATAAGTGAATAGTTTGATCTGGTCGACCAGGTCAGGCCCGATCAAGCGAATTTGTAA<br>AGTTGTAAGATGAATCACCTTTTTGTACTATTTATTTACGGTTTTTCGGGAAAAATCTTTTT<br>CATTTTCCCAGCGTCCTAGAATTGCCTTTCTGTTTTTCTTCTCCTTTTGATTTTCGTATCATT<br>ATTATTACTTTGGTTTCTTAATAGGGGGATGATTCATCGTGAACCCGTTCCCCAACGAAT<br>TGGATTTTCATTTTTTTTTATTTTTGTTTACCTATAAATTTGTTTAGAGACTGTTTTTTAGA<br>TGACGAGAGAAATGTTTTACCAATCCAGCAGGGGATCAGGCTCAACCCGCGGATGCACC<br>CCTTGCTCCTGCAGTCAAGTCCCTGCCATTTTGAACCCACCCGGGTTCCATCGATCCCGT<br>CATCCCTGGATCCAGGGAGAACGCCAGAAGATCG    |
| 40 | 33727945 | 33728534 | 590 | + | AATAATCTAAACATAAATAATATTATATTTTTATTATTCTAGATTGAATTTTTATGTGACA<br>GATAGTGTAATCATACAGATTTTTAGAGTAATTCGTCTGCAAAGACAACCGAAGGAGACA<br>GATTCTCGTTAGAAAGAAAGGAAAAAGAACACGTACGCGAGAAAGCACAGATTCTAAACAT<br>ATAGACATAAATCTTTGAGGGACTGGTGTGGTGCATATTGTTCAAAGATATTTCCGATCGG<br>TGTGTATAAATACATAGCCCGCGGCGACGAGCAGGTTACGTCGATCGAGTTGGAGGG<br>CAAGAAATCACAAGAAAACTGCCTGTGCGCCAAGGAGACCAACACAAGACAGAAAGAA<br>GATGATGAGGAGGTCGATGTTCTTCCCGTCTGCGCGCTCGTCTCGTCACTGCTCTGCGTCT<br>GCGTGGCGAGCCACATGGACGTCGAGCGCCGAGGCGGAGCTCGCGCCTACATGGGC<br>GGCCACGGCAGGCCGTTGGGCATCAGACCCAGAACCAGCGGCAGCCCGCGCGGCCTCAG<br>CGGCGGCACCTGGGCGGCGTGCGCCGGCTCATCGCTGCTCGCCGCCG    |
| 41 | 33748436 | 33749033 | 598 | - | GAAATTTTTGGACCATAAAATTTTGGGAGGCCAAAATGTCATGGATGGTAACATGTGGGA<br>GGGCCAATCTGCCATGGCTGCTTTCATGGACCCACCGGGCAACCGGACCTTGGGCCAAAT                                                                                                                                                                                                                                                                                                                                                                                                                                                                                                                 |

|    |          |          |     |   |                                                                                                                                                                                                                                                                                                                                                                                                                                                                                                                                                                                                                                                 |
|----|----------|----------|-----|---|-------------------------------------------------------------------------------------------------------------------------------------------------------------------------------------------------------------------------------------------------------------------------------------------------------------------------------------------------------------------------------------------------------------------------------------------------------------------------------------------------------------------------------------------------------------------------------------------------------------------------------------------------|
|    |          |          |     |   | TTACTACGCCAAGAAAAAGGGCTTAGATTAACCAAGCATAATTAGCTCTGCTAATGGGACACC<br>GTAAC TAGATCTTTACCCGCACATGCA CCGAAA AACTTCCTCACACGGCCGAACAAGATCG<br>CCGTGCGAATTTGCACACAACGGCACGGCGGTAGGCAGGCAGCGCAGCAGGCCGCCGTG<br>TGT GCCAC GCTGCAGCCCGCCGGCATGGGCCGCCTGGCCGCCAA CACGTCCAGTACGCC<br>GTTCTGTTACCCAAAGCGAT CGTCA AATCCGGTCGGACCACACGCACGCTAAGCACAACGCG<br>AACGCATCCGGCCTCCTCCTCTCTCGCTTTTATTATTTTTTCTTCCTTCTTCCCTCTCCCTCT<br>CCAGT CTTCCGCCGTTCCACCACCTCACGCTCTCCTCCCTCTCCACA AAACCA CCGCGCCT<br>GCCGCCCTCCGGCCGGCCTCCCCAACGCCTCGCGAGGGGCACCGC                                                                                                                |
| 42 | 33755037 | 33755589 | 553 | - | TTGTTGTACCGCCGGACATGCACGGGAGCCACACGGTGCCGTCGGTATGCAACCAAATCA<br>GTTGCAATTGGGGATATGGGGACGAATCTATTGATGATTGGGCGAGAGGGAGAAGGAAA<br>TGCAGAACATGTATAATGGGAGAGGAGAT GACGAAC CACGTT GGGTCAGCGAGAGAGA<br>GACAAGGAGCGCCGGTCACCAAGGACATCGGGCTAGCAGCAAGCGTCGGCGTGGTGGGT<br>GTGTTTTTTCATGACTAGTATTGGGGAGATGAAGACACAGAAGAAAAACTATGAAACGTAT<br>CCCGTCAAGGAACGGGAAATTAATAACCCAACCGACAACCTAGATC AAACCA GCAGATGTG<br>AAACTCTGTCTCC AAACCA ATCTCGAGACATTATGACACTCATCTTTGTCTCTGCTCGCA<br>TCCCTTCTCTCTCTCGTTTCTCTCCTCCTCCTCCGTCCTCAATGACTCCGCCCCACAGCCGC<br>CGTCC TCCCCCTCCCTTCTCGACTCCTTACCCACAGT CGTCA TCCTCCCCCTCCTTCCCT<br>TCCT                                  |
| 43 | 33765168 | 33765751 | 584 | + | TAGAAACTAAAGCTCCCGGTGAGTACCAAACGAAGTCAGTGTAGTTAGGCTTCTCATGACT<br>TTTCTTTCTCGTACTCGTACAACGTATAATGAAATCTTTTGCTACAAAT AATTGACTCAAATT<br>TGTGCAGTAGTAAGATTTTAGACCTTCGGTCATGCCTGTTTTCGAAATAGTTGCATCAGTTG<br>TCATGATGCATCATTGGTGACGACTACTGGCGCCAAAAGAAAAGCCAACACTCCTGGTCT<br>ATTCACAGAAAAGCATCACGTAAGCTTTTTTTCTTATCACCACGAAAACACAGGAAGCATCA<br>GTGGCTT CCGAAG CCAATATTCAAATCCGATGCGAGCGGCGAGCGGGTCCGTCTACG<br>AGCGGCGTATCTTTGCTTGCGGCACCAAAATTTCCCG CACGAC AAGTTCTCCCCCAAC<br>ACGCGCCGCTCAGACTCGGCTAGCTAAAGTTGACGATCCGTTGGCGCGGGAGGCGTGCGC<br>GGAAC CACGAC GACAGCGTGAGGGTGGTGGCCGCCGCGGCC CACGTG TCTTTACGCGCA<br>GGCCGCTGCTGCCGATACCGATGCCGACGCCGA    |
| 44 | 34384446 | 34385041 | 596 | - | GCCAAAGAAAAAGACAACGAACATAGGAGATAAAGAACTGGATCCCAGAGGTGAACGCG<br>AGGGTCTTGATGAAATTCGAAGCAAGAGATAAGCGATCGATAACCTTTAGCAGCGCCAC<br>GAACAGGCGACGAGGCGCGAGCGAGACGTTTCGTCGAAATGCCCCAAAGAATCCTAACCTG<br>CCAACAAAAAGCGAGAACGAACAAAGGAGTTCAAGAACTGGATGGGAGAGGCGAACG<br>CGAGGATTTTTCATGAAATTCGCGAGCAAGAGATAAGCGATCAATAACCTTTAGCAGCGCC<br>ACAAACCGGGCGACGAGGCGCGCTCGAGACGTTTCGTCGTAATGCCGAGTGCCGCACCAA<br>TGAATCCTCCTAACCTGCCAACAAAAAGCGAGAACGAACGCCGACGAGTTCAAGAACT<br>GGATGGGAGAGGCGAACTCAAGGCATTTCGATGAAATCCCGAAGCAAGAGATAAAGAGCG<br>ATCGATTACCTTAACAGCGCCACGAACGGGGGCGACGAGGCGCGCCGCGCCGCGCTC<br>CGTTCGCGCGCGCAGCCGCGAAGGTTGAAGGGGAAAGCACCGCCACCGCCGAGCC |
| 45 | 34400801 | 34401392 | 592 | - | CGAATCGGCTGTCTGATTTTTTTGAAAAATAGGACGTTGTTTCTCTCTTACATAAAAA<br>AATATTCCAATAGTTAATAAAACAATGTTTCTGAAAACAGTGAAACACAATTTAATCACCA<br>GATGATACAAATGATTTAAATTTAATTAATAAACATCTATAGATCCGAGTAAAAAATGAA<br>GACAAAAAATAAAACATCATCCAAACCTACTGCAACATGTTTTTCGAACTAATGAAACATC<br>TAGATGCATGAAATGAAACATTGAAAAATTTACAACGCATCCATACTCTTGTTGGTGTCTCC<br>TCCCTTGTGCACTCCCGACGGTGAAGCGACGACATCGTCCTCGACCACATTACCTTCTAGA<br>ACGTG AGAGAAGAAGAAGGGCCAC CGTCA TCTAGATCTGAGCCTTCTAGAACTCTCGTGG<br>ACGAATATAGTCTCCTCGCTATCATACTCCGTCGTCGCCCTGAGCTGGGTCTGCCCGC<br>CGTCCGCGAGGGACTCCGGCGACAGTAGAGGAGGAGACGACAGCAGCGGAGAGGATGG<br>CGGGGCGTAGGGACAGGAAGAGGAAGGTGAAGGGCAGCAGAG    |
| 46 | 34491677 | 34492245 | 569 | - | GTAGGTTTGCTGTGTTCAATTTGTACATTTTTTTCTTTGTTAACAATATATATGTATATCACA<br>CTATATTAACATATCACTATTTTTAGTATTAACATAACTATGATATTTAGTTTTGTTTTTTC<br>TTAACTGTGCATCTTTATCTGTTCTTTGTTAATATATATACACATATATTAACATATCACA<br>TTATTATTTTGTGTTAATTAACCTGCTATATATACACACTATTTTTCGAGTTTGCTGCTTAAT<br>TTTATGCACCTTTCTCTATTCTTGTTAGCATATTTACACTGTGTTAACACATCACACTATTT<br>CTGTTTATTAACATATCATTATTTTTTAGTGTTAACCTATCACACTATTTTTTTAAGTTTG<br>CCGCTTAATTTATGCATCTTTCATGTTCTTGTTAACAATATATACACTTTTATTAACACATC<br>ACACTTTTTTTTTTTGTTCTAGCGAGTAAGCTGGGTCCCAGCCGCGAAGGAAACTGGTACAT<br>GTTTTACCTAGAAACCGGAAATACAACAAAGGCAAAAGGCCTAGCCGAAGCACCGGTCA<br>ATTGGG                           |



|    |          |          |     |   |                                                                                                                                                                                                                                                                                                                                                                                                                                                                                                                                                                                                                                                         |
|----|----------|----------|-----|---|---------------------------------------------------------------------------------------------------------------------------------------------------------------------------------------------------------------------------------------------------------------------------------------------------------------------------------------------------------------------------------------------------------------------------------------------------------------------------------------------------------------------------------------------------------------------------------------------------------------------------------------------------------|
| 47 | 34494003 | 34494581 | 579 | - | <p>TATAACAATAGAGTATATGTTTTTAATATGATAAATAATTGAACATATATATAAAAAATC<br/> AACGGTCTCATCTATTAAAGCCTATAACATCTTGACCTGGGCTCTAGTTATAAGGGTTTG<br/> GTGTTGTGAAATTTGAACCTGTATATTTGCGTAACGATACATTGTATTAATTTACATTGTT<br/> ACTTTTTTATAATTATATATCTCTCGAGAAATGAAAATGCTTTCCCTAAATAACAATGCA<br/> TTGGTTGCTGATGTTACTAGCCAACAAAAGAAGGTGACCTCCCAAAGTGATGAGCTAGCTA<br/> CAAAATTTTCGGTGCACAACGCAAGCATGCCTGCATATATATCCCAATCCACACACACACA<br/> CCCTTATTGCGTGCCTCGTCTGCCGCCACATATGCGTGTGCTTTGCTGTACGT<br/> GATCGAATTGGGAACCTCTTCTCTCTCGATTGTTGCATGCACATACCGTGCATGCCCCATT<br/> GCACCAATAATTTCTCCGATGGCGACCTCGTCTCATCAGCAAGAGGCGAGATCGATCGTC<br/> GTCGTCAATTGGGCGGCGGCGGCTGATCGT</p>    |
| 48 | 34546000 | 34546575 | 576 | - | <p>TAATAACGAACTAATCAGATAATTAACATTGCTAATTCTAAGTGGAGACTAATTACAGACA<br/> CGATTCACTGACCTGCATTGTCTGGATCTTCTGTAGCATCTCGTGAAGCGAGGAGCGCT<br/> ACAGCTGCGACCAATCTGCAGGTGGCGATCTTCTCTGAGCCTCTGGATGGCTTCGTTGCC<br/> GAATGCTGCCGCTGCTTTTCTCCCTGCATATATAAATCAAATCAGATCAACGGAAGATCG<br/> GCAAGTAATCATCGATGATGTTACAAATCAATTAATGTTTCGATCCAATCGATCGACGTTGAA<br/> GCAGTAACATACAGTTCTTGGCGAGGACGTAGGAGAGACTGGCCATCTGAAGTCTCGG<br/> CGATGGCGAAGGCCGTGTCGTGCTTGAACGACGTGAACCACAGCTTGAGGCTCGCCGGT<br/> GGCCCCCTGCCATGAGGCGGTGCGCGCGCGCCTCGAGCTCGTCCGGCTCTAGCCCCCTCTC<br/> CTCGAACATCGCCGGCTCGTACGCCGGCGCCGCTCTCTCTCTCGCCGCCGCGCCGC<br/> GTGATCGGTTCTGATCCGCGGCGGCG</p>        |
| 49 | 34896918 | 34897507 | 590 | - | <p>CCGCTGTAGAGAGCACTTAGTACCAGGCACACCAAGGTAGTCCTTTAATTTAATTCTGATGC<br/> CATTAAATTAACCTCGACCACTCCTCGGACATTAAGGGGGGAAATTTTTTTTTTTA<br/> GAAACGCTTTTTTCCCTTTATTTGAAACAAGAAAATTGAGGAGAAATGACGAGACTC<br/> ACTGTCTACGAACGAGCGCGGCACATACTACATTGCACAAATCTACGACCATCTCTTCAAT<br/> TCTGGGTCCTAAATCAGGGTGCCAGATCAAACCCAGGTAATCAGGTTCCAATCTCGCCCC<br/> AAATTCCAACCCCATTTGCATACAAGAACGCAATGGTGGAGAGAGAAACCAAAAAA<br/> AAAAAAACGAGAGACAGAGAGTCGAGTCCCAACCTTTGCGCAGGCAGAGAAATCCG<br/> GTAACCCCCCTCTCTCTCCCTCCACCACCTTCGCTCAAGAATCAAAGATCCAGCCTTCC<br/> GGCCGCGCAATCCCGCGCGCGGGGAGGTGAGTCAACCGATCTGCTTCCGAACACGCC<br/> GGCATTTCGTCCCCCGCAGCCCCGCGCGGCGCGGGGA</p>          |
| 50 | 34977772 | 34978310 | 539 | - | <p>TGAATTTGTATGACTAGTAAGATTCCATTAAAAATGCAGAAATTTACAAGAAATTTCA<br/> GAGAAACAGTTGAATCCCACGGAGAGATGAACATTTTCGCACCTCCAAAAACCCCTCACC<br/> ACGGACGAAGCAGTAATAAAACATAGTTGTTATCCTCGATCTCCTGTTTCCTGGTGGCA<br/> TAAGCATGACATGGAAATTCATCTAGGTTTTAGCATCAACCATCGATGCTGGCTAACAAC<br/> AATCTCTGGGCTAAAATTTTGGGAATCGAAGTTGCTAAAGCGGGGCAAGCTTTGGGCCAG<br/> AACCGGCAAGGTCAGTGTGGGCTAGGCTAAACAGAACTGGAACCGAGACGGAGGAGTA<br/> AGAACCTGCAACAAGGAACCCCCCCCCCTCTGCGGCGGCTGCATTGGCCGGTGCGCC<br/> GCGCCTGAACGATCCCCCTCGTCGCCGCGCGCATGGATTCCCTCTCCAGCCGCGTCT<br/> CGCCATCGCCTTCTCCGACGACCCCGTGGCGCCCCGCGCCTCGCCGT</p>                                                             |
| 51 | 35053715 | 35054312 | 598 | - | <p>GTTTCGTACCTGAAGATGTCAAAATATTATACTTCTGAAGAAAAAAGGAGTCATC<br/> GTCAATTTCAACAGTAAAGCTTGATAGTTCGGCCAAGGACAGTGAAACCGACCCCTAGA<br/> GAGGGAGTAGTAAAGTCTTCTATATGAAAAAAGGAAGGAAAGGGTGTAGTATTG<br/> ACTGTACTAATTGAATGAAGCAAATAATACGATGGCTGGGAAGTCTATTTGTAACAAGTC<br/> CCGGATGACTTACTGGTGGGACAATGTGTGATTGATCGCTGCTTTAGCACACTGTTGGT<br/> CACATAAGGGCATTAGCAGTGCATCCGGCTTGTTTCGTGTGACCATGTGCTCGACATAGAC<br/> AAAAAGTGAATGAAGCCACACATAACAAATTTAATCTCCACAGTACGCCGGCCTCCCTC<br/> TCCCCTCCCAGGTCAATCCCTAACCTCCCAAGCCGACATGTCTCTCCCTTCCCACCA<br/> CCACTGGCACAACCTCACTTCTCCGACCGTGGTGCAGCTCTCCCTCTCTCCGTGCTCCC<br/> CCTCCCTGTCGGCGCCTCTCAATCGTGGACGCCGCTTGAGCCAGCTC</p> |
| 52 | 35092265 | 35092849 | 585 | + | <p>TCCTGTGTTGAAGCCTATGTTAGATAATAAGTTGGCATAAACCGAATTTTCATCATGGCACC<br/> TAGTTCTGCACGGAAGGAAAAAAGCTCATCCAAGTGTAGCTCAACAGCAAAAAACACC<br/> TTTCAGACTCATGAAACCAATTCGTTACCAGCATAAATCCAGATTATCAGTCAATATATTT<br/> GTCGCTCCCTATAAAATATAAACCTCTGGACCACTGTTCTTTTCAATACATAGTGTGGCCA<br/> GCATCAGTATATATGAAAGAAAAAATCAGGCGTGTGATAAATGTATAGCAAAAAACA<br/> AATTAACAAACCGGGCAATTTTGGTAACAGAGTCAGATAACTGATACTATGACTGCATCAC<br/> AATCCTTAACAAATTCGACTCAAACTAAGCAATTGCATAGACAATTAGGATTTCCGAACA<br/> ATTACCGTCGTTCTGGTTAGCCGTAGGCGATCAGGCGAACAACCTTCCCCGCGGCTTGTC</p>                                                                                                       |

|    |          |          |     |   |                                                                                                                                                                                                                                                                                                                                                                                                                                                                                                                                                                                                                                                                          |
|----|----------|----------|-----|---|--------------------------------------------------------------------------------------------------------------------------------------------------------------------------------------------------------------------------------------------------------------------------------------------------------------------------------------------------------------------------------------------------------------------------------------------------------------------------------------------------------------------------------------------------------------------------------------------------------------------------------------------------------------------------|
|    |          |          |     |   | GCGCACCTGCACCGATATGTCAGAGCCGGGGATCTCCCTCAGGCCTCAGCTGCATAGGCG<br>GACGACGGCCGCCACGGCGGCGGAGAGCCGTGCTCT                                                                                                                                                                                                                                                                                                                                                                                                                                                                                                                                                                     |
| 53 | 35375036 | 35375528 | 493 | - | ATACATCATTTGATTTTGACCTGGTGACAAATGAAGCAGTGATGATTTGTTTGGATTATGTG<br>ATGAGTATTTTTAGTAGTGATCTTAGTTTTTGTCTCTGAAATATTTAGTCTAGTAAGGGCC<br>TTGTGCTTCAA <b>ATTATAGTGATA</b> AGCAGGTTGATGCTCTGATCTAGCTTTGGGAATCTAT<br>GAGAGCAGAAAAGCTATGCTATGAAGTAAGTGAATATTTTTGGTTATTGCCCTGTTACAGAT<br>ATGTTTATCATGTTAAATTATTTTATTGTGG <b>TATAG</b> TTTTGTTGTTTTGTAATTTTGG <b>TATA</b><br>TGTTATTTTAGCATTTGAAACTTGCAGCATGTGCAGAAAGTTGCATGTTTGTGTGGCTGAGT<br>GTTGAT <b>TATAC</b> AGATTTGAAGGATGCTTGAGTGTGGCCTGCTTTTGTGATATTTGTTTGACT<br>GTGTAGGTCTATCATTTAAAAAAATCTGATTGATTTTAGCTATTTGTAGTTTAAAGA                                                                                                  |
| 54 | 35464723 | 35465310 | 588 | - | TTCTACCTCCTTTCTTTTTCATGATTTTTCTGATCAGGAAAAATAAAAAATTATGTCAGTTAT<br>TTTGAAGTTATTCTAATATCGTACACACAAAAATTTGCAATTATTCATCTACTACTGGAATTT<br>GGATTTATTTTATCGATGCAAATTGGATTGGATAGAAGGGTACATTCCTTTATTTTAGATA<br>GAAGAAAAGTTTCTTCTATCTAAAATAAAAGAATTTTGCTGATTTATTTATTGCT <b>TATATCCA</b><br>ATTTATGAAATTGATACACCGTTTAATTGATATCATTTAGCAAAATGAAAGTTATGTAAGGT<br>ATCAAAGTTTGACTGCAAGCACTATTTGAGAACGTAGATGTAGTATTTTTTAATTCGTACC<br>TGGTGCTTTAATTTGAACTCAATTAATTACT <b>TATAC</b> AGGCTTAATAACAACACTTTTCTACTG<br>ACACGGTCATGCATGCCATAATCAGATGTTTCAGAAATGTCTGCTAGCCGACAAATTAAGA<br>AGC <b>ATATATACT</b> CCAGGTCGTGTTAATTTGTAGACACTTTAATCTCAGAACAAATTGCGC<br>TGCTGAAACATGCGCGGCCGCGATAATCC |
| 55 | 35723764 | 35724358 | 595 | - | CGCTGCTCCTTTTCTTGTTCTCGCTCTCCCTCTCTCCGCTCGGTTTGCTCCCTCCTCCAC<br>TTCTTGTCGGCCTCTCTGCTCCTTCGGCCTCGGATTCTCTGTGTTTTTCTACCCCATTCG<br>ATCCGTTTAAGCTGAAATCTTGAGCCATTTTGGGATTCATTGAGAAGGAATCCACAGTTTG<br>GATTGGTTCATACTCGATTTGGTTGAAGTTTCTTTCTTTGCGGTCGTTTTAGCATGAGGA<br>GGGGAAGTGAATCTCTGCTTATTGTGACAATGCTATCTGAACAAAATGCATTTTCTCA<br>AGT <b>TATAT</b> TTCCAGCAGTACGAGCGGGAGGTAACGCGCTTCAGTTGTGAACCCTGCATGCC<br>TTGTGATTCTTGCGGTTTTTTTTTCTGAATCTTACTTGATGTGTTCTTTTCTGGCATGAAGG<br>AATGGCTCCTTGGAACACCCTACCCGGACGTCTTCCAGGGAGCTACCAAGACGAGCCGG<br>ACGGCGAGGCCGGCCGGGCGGACTCCGCCGCCGACAGGCCGTGACGAAGTCGCCGCC<br>CGCCGGGAGGAGCCCCAAGGTGGAGCGCCGCAT <b>AGCGAT</b>                   |
| 56 | 35877995 | 35878586 | 592 | - | CCTGCACCTTTGCAGGTGATAGTGCTGATTAGAAAGTGGTCTCAATTAGGTTAGGTGTTG<br>ATCGAGTGCCTAACACCCTACTAAATCCACATATTGGTT <b>TATAT</b> CAAAATATCGTCGTAGA<br>AAAGTCTGCAACTCTGAACAGTTAATCCCTGAATTGCAGGTCTAAAGGTGAATGTTTTGC<br>AGGCACTGTTACTTGTTAGTGTTGGTTGGAACCTGAAAAAGATTCAAGTTTGCCCCCTAC<br>AGATTCATAGGCACTCGGAAAT <b>ATTATAG</b> AAACGGTGAACAACCCATGCAAACTTCATA<br>ACCACCTTTCTTACGGACATGGTGACATGATTGTACCTGAAAATGCATGGCGCCTGAGGTG<br>ACAGT <b>TATA</b> AAACCCTAAACGATTAAATTATGGTAGAGTTAGTTTTTTTTTCTGTACAGTAAT<br>CTAACACGCTGCATAGTGTTTTAACTGTATGTCTGTTTTTTTAAACCCATGCGAGGGCAGCG<br>AGGCCAGAGCTGCCGACATTTCTTGGTGGGAGTCCAATATTTTTTGCCTGTAAGAAGAG<br>AGGAGGGCCCTCTGAAAGTCTCAAAGCTCGAGGTGTTCT  |
| 57 | 36056999 | 36057577 | 579 | - | GAGAGTGAGTGAGCGTAGAGTGGAGTGGAGTGGAGTGGAGTGAAGTTGATATCTTCATGAGTG<br>GACGAACCCGTCGTGCTTTTTGAAACTTATCTGCATTGTTGCATCGATCATTGCATGGTTTA<br>ATTGGTTAAGGGATTGGAAGGTGTACTGCTTCATCAACTTGAAGTGTTCATTGGAATGGA<br>ATGATGCATGTTTTGAGGCGGCTGTGCTCTACAATTTGTCGTGCTCTCAAGTGATTTTTG<br>TTTTAATCATAGGTGATCTTTTTTTTTCTGATTTGAGTTTGACAGGTAGTCGACTTCGACACT<br>GAGTGTTGCAGATATTTTACGAATGTCCTTAGTCAGAGTAAATGTTGAAGATTTTTTTTTCT<br>GTGGGGCTCGAGTTTGACCAAAAAAATGATCCACTCAAACAATGGCCAGTAACAAGTAC<br>AATGGGCAGTGATGGAGAAGCAACAGGGCTCAAGGCCCGCACACCTTCACGCTACGCGAC<br>CCAATTCGACGGCCCCAGCCTCCCAAGTCCAGCACCAGGGCCAAATCCCCAACAGAAATC<br>AAACTCGGCCGGCGACGGCGAGTTCCT                                     |
| 58 | 36088816 | 36089410 | 595 | + | TTCAATGGCGCACACGATTCAAT <b>GCCACT</b> TAAATCACCGCGTGTGGTAAGAAGAGGGGAA<br>AAAACGCAAATTGATCGGTTAACCTTCGCAAGCTGTTTTCGTCTCCTCGTTGGGAT <b>AGCGCG</b><br>TTGCTCTTCATCCATGTACGCTCGAATCAACAAAACTGATAAGAAGTTGTCTATTTTTTT<br>ATCGGCAAATGTTTTACTCGGCAAAGACAAACGTAGCAGAGATCAATGTGAAGAATCATG<br>AAAGATTGACAATGACCCGGGTTCTCTGGAAAATGAGAAGAATCGAAATGCAACGCGAA<br>ACCGATCAAACCTCGAGCATCTCTAGCCATGGTTCCCCATGAGAATATGAGATCATAAGCTA<br>CAACGAGCTGCTGCTTGCTCTCCTCTCCATCTCGAGGAATTGCCGAGCGACGGCGCGGCG<br>CGGCCGTTCTCCAGGTGGCTCCGGAGGCAGAGCGACAGCAGCAGCGCCTGACCTTGCCG                                                                                                                          |

|    |          |          |     |   |                                                                                                                                                                                                                                                                                                                                                                                                                                                                                                                                                                                                                             |
|----|----------|----------|-----|---|-----------------------------------------------------------------------------------------------------------------------------------------------------------------------------------------------------------------------------------------------------------------------------------------------------------------------------------------------------------------------------------------------------------------------------------------------------------------------------------------------------------------------------------------------------------------------------------------------------------------------------|
|    |          |          |     |   | CTCTTGCTCGTCGCCCTCGCGCTCCGGCGCCGCCGGCTACGGCTCTCCATGGCGTCCACCAG<br>GCCGATCAGGCTCGCCAGCGTCAATCCCGCCGCCGGCGCCGCCGCT                                                                                                                                                                                                                                                                                                                                                                                                                                                                                                            |
| 59 | 36110385 | 36110848 | 464 | + | AAAAAACGACCAAATATTTTCATCGCAAATATAAATTTCTAGTGCAACAGACCCAGGCTGC<br>GGATGAGCAGGTGGGAGACACTCACCGCGTCAAGTGGCGTTGTGCGCGTCCATGTGCGGCGC<br>GCAGGCGGGCGTAGAGCTGCGGGCTGCGGTACAGCGAACAGGCGCCGGGCGCGAGAT<br>GATGCGGGGCACGCTGTGAGAGAGATGGAGCCATGTAGAGCAGCATCGCCGCGACGT<br>ACAGCAGCGGAGCGAAGAGGAAGACCGCCTGCCGCCGACGAGCGCGGCGAGCACCACC<br>CTCGCCGCCCTCCGCACGGCGCTCCGCCCGCACAGCTCCGGCCGCGCCTGCCCCGCC<br>CCGCCCTCGCGACCCGCCCTCCCCGACGACCTCTCCCGCCCCCGCCGCGGCGAAGA<br>CGGCGGCGACGGCACGGCGCGCTCCGCCGCCGCCGCCGCCGCC                                                                                                                             |
| 60 | 36376917 | 36377475 | 559 | - | AGATTCACCGATTGATAACACCATGTTTTATCTGAAAGGCATATGCACTAATGTGCGATTAT<br>TATGTCTGGAATACATAAATTTTCATGATATTTTTAATAGAAATCCACACGATACTGTAGTT<br>CGTTATGCGCACAAATTTTACCCATGCCAATCAGACTAGGGTGGGTTGTCTCGTGGGC<br>GGTTAACTTCGGCGTCAACAATATCTAGTGTAGAGTTTTGCGTCCATTTCTGAAATATGTT<br>TTTCGAAAGGGTTAGAATGTAAAAGATAGCTGTTATGTAAACTAATCCTTAAAAATAATAT<br>TCTAAATATCGAAACCAATTTTTGGCTCCACACATGACCCGATCGAATGGTAAACACACAGG<br>CTCGCGGTGAGAACGTGTGACCAGCGTGCAGCCGTGCACCGGCTTTGGTGCGCGCTCGTTT<br>ATTATTCGGCCCTGAACGCTCCGGTGACGAACCTCGTCTACGCATCATGAGTTTCTTATCTC<br>CCTCCGTGGCTTGACCGCTCGAGGGGCCACGAGACTCACGAGCGGCGGCCGCCAGCCAGC<br>CGATGC             |
| 61 | 36427148 | 36427603 | 456 | - | TTTCTCGAGTTAAATTTAGCCTATGAGTTTTTGGCATTGACTTTTTTTTACTGAGTTAAA<br>ATTTATCCTATGAGTTTTTGCAAAATTTCTCTTCTGGCATTGACAATTTTTTTTTGCTGAGTT<br>AAAATTTATCCTATGAGTTTTTGCAAAATTTCTCTTCTTGTATTTGCAAAATTTCTCTATTT<br>TTTGCAATTGACATTTTTTCACTGAGTTAAACTTCTCCCATGAGTTTTTGACGCTCAGACA<br>TTGCAGTTTTTACATTGACAATTTTTTTTGGCTGAGTTGAAATTTGCTATGAGTTTTGAAC<br>TCTTCAAATATGGTCAATCTTTCAAGAGCTGAAAATTCATGGAACATTTGACGCGCAGC<br>ATGGGCAGCTGCCGTGGTAGCCGGATGGTGGCTTTGCCGTTGCTTTGTAGGACTAATTTT<br>AAATTTTAGAATTGC                                                                                                                                       |
| 62 | 36503588 | 36504163 | 576 | + | AAATTAGACTTGGTGCAGGAGTGGCGTTTTAGACTTAATTCGCACTTGACAGCTACTAGGG<br>GTTTTACTTTTTCTAGAAGGGTCTGAAATTGATTTTTCTTAATAAATATAGTTGAATTGTA<br>CGTACTTCTAAGCCTGGAAGCACTAAGATGCAATCGGTGAACCTCAAGTCCAGCATTTTTTC<br>TCAAGCAAAGCACCTTAAGGACAAATCCTTTCTTGCATCTGTGACTGTGAGTTGCCATCAG<br>ACATTGAGCTGCTAATTCTCCAGTACTTGGCACTGGCAGATCTGCCGATGTTCCAGCGG<br>AGCAAGAGGCTGGATACTGCTACTAGCACTCACGCAAGCGAAAGAAGCACATGAAC<br>GCAAAGCACCAACGTATGTGCACTGTGCAGCGCAATCGCCGAGATGCCGTTCTGTAAAGC<br>GGCGAAAGATTTGCTTTTGTGTGCCAAAAAGGCTGCTAGTAGAACATCCGATGCCATCC<br>GGACCGCCTACGCGTGACCGCCACGTCGGCCGACCAACGGATCGCAAGCGAACCGAAAGC<br>GCGCTGCGCCGCCGCTGCCGCCAC     |
| 63 | 36798702 | 36799236 | 535 | - | GCAGCACACTTGCAATTATCGATTACAAAGTCTTTGACCAATAATACTTATTACGTTTTAATT<br>TTAAATATTATTAACCAATAAAATAATAAAGTGAAATTCCAATTTGAGACAGTATTACAGTT<br>TTTATTTATATATTTTAAATTATTAACCTAATAAAACATAAAATTAATATAAATGTATTAGA<br>ACATGTCTACATATAATTTTGAATGATTAATTTGTTTTAACTATTAATTAATAAAATCAA<br>ATAATTTGGGAGTACACGATAAAGGTGTAATGAATTTGTGTGTTGACCGCATATGGCAC<br>CTCCAAGTGGCACAAATATTTATATTTTTCTAGAAAATTTAATGAAGACATGGGTTTGCA<br>GCTAACCGGGGATGCATTTATCGATGAATGCTTATGATGTGTGTTGTGATATGTGCATGT<br>GTGTCATTGCAAGTTGGGAAAAAAATGAAACAGTTTTATCCTTGATACTTATAAATGAAG<br>TGTTTTTTTGGTGCGGAATAAAAAATGAAGTTGATCACGC                                              |
| 64 | 36892174 | 36892762 | 589 | + | CTGAGGAAGGAAAGTTACTTGTACAGAAACAATCAAAATCAACTTGCTGCAAGGGTGTGC<br>ACATCTACTTTCTGTTCTTTCTCTCCCTTCATTCCATTACAAGTAGCACTTCGATCCTTAATT<br>CGTCTCTGCCTCTCTCAGAAAAAAGAAGAGTAATATGAATATATGCATTCTGGTGTCAATT<br>AATAGGCACCATGTTCCCGACATACCACTGTAAATATGAAAAAAAATGAAGAGTATA<br>ATTGGGAGGAGGGGAGAAGAAAAACAACCACGAGCGTCTCGTCAACAAGGAGAG<br>GAAATCCAAGTTATACTCGTACAGTGATGGCGATGCAACTTGACACCCCTCGTTGGCGGC<br>TAGCCGTGGCTCACGTTTCGCTGTGCTCGCGCGACGCCGAGGCGAGGCGGGGCGGGGC<br>CGCGGGGTGGCCAGGCGCGACCTAGGACTGGTCCTCGCGGCCGCTCGCCACAACGCCG<br>CCCCGTCTCGACCGTCCAATTCGGGGGCAACCAACCGATTCCACCGGGGCGATCGA<br>AATCTCCTCCGGCCGTTTGGCCGGGTGATCCCAACACCGG |

|    |          |          |     |   |                                                                                                                                                                                                                                                                                                                                                                                                                                                                                                                                                                                                                                                                                                                            |
|----|----------|----------|-----|---|----------------------------------------------------------------------------------------------------------------------------------------------------------------------------------------------------------------------------------------------------------------------------------------------------------------------------------------------------------------------------------------------------------------------------------------------------------------------------------------------------------------------------------------------------------------------------------------------------------------------------------------------------------------------------------------------------------------------------|
| 65 | 36962635 | 36963223 | 589 | + | GAAGATGATTTTTTAAAAAAAATTCAAA <b>ATATA</b> AGACAAG <b>TATAT</b> TTTTTAAATTATTA<br>ATTACTTGATTAAGGCTATTAGTTTTAGTCTTCACTATTAATAAATATTGTACCAGATGTG<br>TTGGAATTAATTGGGATTTACTAAGGGTGAAGGTTTTATGAAAAAGATAAGCCATAAAACC<br>TATGATTATGTC <b>ATATAATATA</b> AGTCATAACAATCGGTGTCTTTAACTTAGGTCATAAA <b>AT</b><br><b>ATAT</b> TACCTCCGTTCTAAATTTTAG <b>ATATATTATA</b> AGAT <b>TATA</b> CTTACTCTGTTCTAAAATA<br>AATTAACCTCGTACATGATGCGAT <b>TATAC</b> GAGTT <b>TATAT</b> CTCGTATGAGATTAATTTATTTTG<br>GGACCGACGGACTAGATATTAGTGTGAAATTTGCACAGACGAAAAGGAAATACTAGTAGC<br>CAATAGAAGAAGCCACAGGTGCGCTAGTTAAGTTGGGCGTGATGGGGAAAAGCAATAG<br>ATGCGGCCAGTCCATTTATCAGGACGCAGTGTGCAAGTTCCAAAGAGGCCACCACCGG<br>ATTGGATTGGCCGAGACCATCATCACCGCCATGATCACCA |
| 66 | 37150985 | 37151580 | 596 | - | GGATAGAAAGTAAGGAAAGGGAAGATGGGAGAAAAACAAATAATGAGAGAAAAGTAGG<br>GGTTTGAATAAAAGTAGATTTGTGTCTTGATTTTACACCCTATTTCTTAGCACTTACATATCA<br>TTTTTAGG <b>TATAT</b> GTTAGATTTTAGTTTTCATTTTTAAAAATATTCACTGTATCGAAACTATG<br>TATTGCTAATACTCGATGTTACACAGGCTAAATACCCAGCGTGCCA <b>ACGTG</b> CGCGCTGATTT<br>TCTAGTCTATTCTATCAGCAGGCCAGCAATGTTTGGTATCTAATGGGCGCTCGGACCACTT<br>ATCGGAGGACTTGACATTGGGCCATATCACTTACTGGGCAAGATTGGGCGCATCAGCGTAT<br>TGTCCATGAAGGCTGGAGAGAACGACGAAACGGGGCTCCAAAGCCCGCATGTGCTCATA<br>GGTCGTTATGGCCTTATGGGCCTTGCCGGAATTAGCCAATTAGGCCTTACAATTCCAACGTC<br>CGACGTCGTCTATTAGAGACGTTCACTCATCTCATCCCCAAAGGCCTAAGCCCCCAC<br>GATCCCCATGCCCGCTGCAGCGCACTCG <b>TATAT</b> TCACGCGA                                                 |
| 67 | 37419706 | 37420298 | 593 | - | TGATCCATCCAGGAAATTCATTTCTGGACTTATGTGAATGATGTAGATCT <b>TATAT</b> CTCATGG<br>ACTTTCAAATTTTATTGAAGAGGTTTACTACTCTCTCCTAAGTTCAATATTTTGCTTCCAAC<br>TAAATCCATATGCACT <b>TATA</b> ATAATTCAATTAGAAGTACTGTTTGA AACCTTGATGAAATT<br>AGTAGTCTTTGCAGGCAATTTTGTCCGATACATATGGATGTTTTCTTAAAA <b>ATATATAT</b> TTT<br>GTTTTCTCCGTAGTGTTTACCAAATTGATGGTGTTTGACTCAAAGTTGTCAAAGTTCAGTTA<br>ATCTTAAGTTTACTCCCATGTTTGTTCAGGATATGGCTGGACTAATTAGTAAGATAAATCG<br>CTCCTCCATTGGCCCTTTGCCTCCATGCTACTCTCCATCTATGTAAGTGCACATTCAC <b>TATAT</b><br>CTGTATTGATCATACATGGAGTCTTTGCTTTTTCTATTTTTCTTGTTTATAAAATCCAATTTT<br>CTTCAT <b>CGTCA</b> TATCCGTTGTAGTTTCTTTTGACAAACTAGCTCTTCCACGTATTGTCTTTC<br>TCACTGTGTTCCAAGTCAAATGATAGA                                 |
| 68 | 37422578 | 37423170 | 593 | + | ATTGATCCATCCGTGAATCCATGGTTCCTTACCAAACCTTACGCAATTTACAGCA<br>GCAAATCACCTCTGCAGAACTTCAATCTCCAGTACTCCAATGCCAATCTCCACATCTCCTAC<br>AGGCAACAGCTCCACGCCGGAAGCGATTTCTGCAAGAGCATCGGGGAAAAAACATAAGCG<br>TAAATCGAACAGCACTACGCTTGCATCAAAATTTAA <b>CAACCA</b> TACTCTGTTCTATCCAAT<br>AGAACCCTCACAGTGAATTTACTCAAACGAGAAACAACAACAATAACAGAAATCCA<br>ACAGAAACACCAAGCCTCACAAAATCCATGGCCGACGTTTTCGCGTCTGTACTACGCACAG<br>GAAAAGAGGGAGAGCCACCCCTCACGAGAAAAAAGAAAGTATTGAGAAGCTTAG<br>CAACTGTACTGCACACAGTTCCACCAACCGCGC <b>GCCACT</b> GCCCGAGACAGGGACCTTACC<br>GCGGCTCTCCACCCGACATTCGCCACGATCGGAGTGCTCCGGCTACGACGCCGCCGCCG<br>CGCCGCTCCACGGCGGGATCCCCGCCGAACCCCGCGACGCC                                                                             |
| 69 | 37601434 | 37601979 | 546 | - | GTAAATGGGGTATGATTCCGTTGTTCTCTTCC <b>CGTCC</b> ACATCTGGTTCAAGCCTCCT <b>TA</b><br><b>TAAA</b> AGAGGAATTTTGGAGATTTCTTAGGAAATGAAGCTGTT <b>TATATA</b> AAATACT <b>TATA</b> AA<br>ATTATCGTGTCTAAAAAGGTTCTGTTAATCCCATAGGCAACCATCTAGATCCTCCCACTGT<br>TACAGACTTCTGTCTACCACCATCAACCAACAGTAGCACAATTAATTGGTTGAGATTATT<br>CCTTGGTGAACGTTCAAACCCATTGGATGGGAATTGATTTCTTCCAATTGAAACTGATTT<br>TTTTTAAAAAATACTTAACTGCAAGTTTTCAAACATTCTCAGTTGAAGTTTGTCTGTT<br>CAAATTGGGTGTGCCT <b>TATC</b> CAATTGAAAGTTTCTCGGAGATTTTCTCGTGTCTGAAAAA<br>GTTTTGTTAATCCCATAGGCAACCATCTAGATCCTCCCACTGTTCCAGACTTCTGTCTAC<br>CACCATCATGTTTTTTTCTTTGAAAAAAGGGCATCTAATTTAGCTT                                                                                          |
| 70 | 37905546 | 37906115 | 570 | + | TCCCTTGTTGTCAATCATTCAAAGTGAAGCAGCAAACCTAGGATCTCCACAAGGATGCTAGT<br>CAAGGGTATCCTTAAACATTAGTAAGGTCTTAGACTCTTAGTGACCGTGCTGGCTCGGCA<br>GCAGCAAACAAGAAGGCAATGCATTG <b>ATATATA</b> AAACAGAACTGAAAACAGCATATCATTT<br>TTCGAACAAATGAAATGGCATATGATGATTTTAAGCCGATTGCGCCCAAATTCACGGGA<br>AGAAGGGAGTACGAAGAGCACGAGCAGACCACTTGCTTGGCGGCGCTGGCTTTCGCCAC<br>ACCATCCCGGATTTCTGCGACGGCAACCGTGCCAAGTTGCGCACGCCATCCATGGCAAC<br>TCCCTGGCATCAATGGGCGCTCTAGAAGCCGGGGCTTCTGGACCGATGCAGGCTGCTGCC<br>GTTGCTGCTGCTGCTCTCTGGATCCTCTTGGCAGCAGCTCCTCGCAACCGTCTTCTCT                                                                                                                                                                                        |

|    |          |          |     |   |                                                                                                                                                                                                                                                                                                                                                                                                                                                                                                                                                                                                                                                     |
|----|----------|----------|-----|---|-----------------------------------------------------------------------------------------------------------------------------------------------------------------------------------------------------------------------------------------------------------------------------------------------------------------------------------------------------------------------------------------------------------------------------------------------------------------------------------------------------------------------------------------------------------------------------------------------------------------------------------------------------|
|    |          |          |     |   | CCTCCTTCCCCACGCCAACGCCAGCGCCGCCACGCTCATGGCCACGGACCACCCGGTCGGG<br>ACCGAGCGTGGTGTCTGCTGG                                                                                                                                                                                                                                                                                                                                                                                                                                                                                                                                                              |
| 71 | 38057051 | 38057650 | 600 | + | GGAGAAGTTGTTAGTGAATACATGTATATAAAGGAGACCATAATGCTACCATTGAGAATT<br>AAAAAGAAGATGAATTGCTCTCAAGAATCAAGACCTTCAAGTTTTTTATATTTAATCTAGCT<br>CCTCTCAAAGCAGCAGGTGGCCAAATTTTTCTCTCCATCAATCAATCCCAAATTTTACAC<br>GAACGAACCAACAATTACATGTAGTTCACACTTCGCAGAACAGTGTAGTGTGTTAGGTCCA<br>AGCATCATTAGCTGCTAAGCACGATTCTACAAGTATAATCTAGGACATTAATGTAAACCA<br>CATCAAAAATCCGCAAATACGCGCAACGCGTTAAAACTAACAGGGAAATCTCCAAAATA<br>AGCCGATCCCTGTGTTGGTGTGTAGGAAGGGAGGATTCGATAGGCCATCGAAAGTGATC<br>GAGCGGGCTCACCATGGGATGTACTTCAGGGAGAAGCCATCTTCGACGCGCGTCTTGACG<br>AGGGCCTCGGGGACCCTTACCAGACTCCCTGAGGACCTCGGCGAGCGGCTTGCTGATG<br>CCTTCGGTGGGCGCGGGCGCGGCCACCTCGCCGCCGGCGAAGTCGTCTCTCT |
| 72 | 38286122 | 38286714 | 593 | + | GCCCCAATATTGATGACCAACAGCACAGAATTGCAGTAGGCACATCTATTTGACATCTCTT<br>CACTAACAAAAACAAGATGCCACTATAAAAAATTCTATAATGTACGATAAAAGTGCTAG<br>TGTGCTACAATCCATTCCCACTCTAGAATTTGCACATGTTTAGGCTTCCACTTGACTCATGT<br>AATACCACTTCAATTGTGGAGTACTATGTAAATGCAAAATGCAACTAGACAGCATTTCGGG<br>TAGGTTAATTCGTCTAAGTACAATTTCTGAGCTGTAGGAGTTAACAAAAGAGGGAGTTTTA<br>ATTCAAGGAGAAAGAGCTGGGAGAAGGTAACCCGTGGGAAAAAGAGGGGAGCGTGCG<br>CCTCACTGGGATTGGTGATGGCGTGGAGCACGCCGAGCACGAGGAGGGAGTCGCCGCCG<br>GCGCGGAGGATGTCCCGCGCGTGACCACCGCCCTGAGCGCCATCCTGATCTCTCTCTCC<br>GGTGGTCCCTCGTCGCTCGAGCGCCAGCACCACCATCTGCGGCGGCGGAAGCAGCGGGC<br>GCAGGGCCGCGGGCTGGACCGCTGCCCGCCGCCCGCAGCGGCGCTC        |
| 73 | 38336411 | 38336924 | 514 | - | CAATGCCCTTGAATGGCTTATTGCTTGCAGGCATGTGCTTGCCTTGCATGATGCTTGGGCTT<br>CTGGCTCACGACCTTTGGCTTCTTGGGACCCTGGCCTAAGGAATCATTGTCATGATACATG<br>TGGGAGTACTGGATGGGGTTGGAGTTGGAGTGGTTGAGAGGATCAATATGGAGAGAGAA<br>AATAATGTGCACAAAGCCAGATTGAGAAGGTTGGGACGAAAATGGAATGCGTATAATAA<br>GTGATTTTGATCCAATTGGATTGAGATTTTGAAGGACTCCCGTGCCGCTATCCCTTGGCG<br>ACATAAGAGGCGAAACAGCCTTGAGCGGAAGCTTCCCCACCGCATCCTGCTCAAGTCGACA<br>TCGGCGATGGCAATGATGGCGTCTTCCACCCTATCTCCCTTACTCCTTCCCTTCTTCTTCC<br>CTTCTCATTTTCTCTGGTTCCACCTTGACTCGCCACCGTTAGCGTGGCCACCAGCGACGAC<br>GGTACCGGCGGCGGCAGCACCTCC                                                                                        |
| 74 | 38495141 | 38495665 | 525 | + | AAGGAAACAAAACTATATGTGATATACATTAAGGGATAAATATTGGGTTTGTTGGTTAA<br>ATGAACATTTGGACCTAAATTTATAAACAGGGGAAAAAACTACAAGTTATTTACCTTTTGG<br>GGGTAAACATTGATTAATAAAATTAATAAACTTAACAGAATTATTGGGGGTAAACATTGA<br>TGCAAAATGCAAAATAATGTTATTTAGCTTTTGGGGATAAACATCGATTAATAAAAAATAAA<br>TAACTTAACAAAATTTTGGGGTAAACATTGATGCAAAATGCAAAATAAACTTCACAGAAT<br>TAATTGTGGAATAAAACATTGATGCAAAATGCCAAATAAACTTGGGGTAAACATAGATGAA<br>AAAACAAAATAAACTTGGGGGTAAACATTGATGAAAAATGCAAAATAAACTTCACTGAATTA<br>ATTGTGGAATAAAAAATGGTCCCGGCGGGGCTCGAACCCGCGACCTTCGGCTCATAAGAC<br>CAACGCTCTAACCGACTGAGCTACGGGACCGCAACAGCT                                                                        |
| 75 | 38498507 | 38499085 | 579 | - | GCTAGAATAGATTCACACTTGCCATTTGCTGCAAGATACAGAGCATGCCATCTTGGCCC<br>ATTTACAGGCAGCTTGCTCACACTGCAAGGCTCTCTGAACTTTACAGCCGCTATCTATTTTG<br>GACACCTACCAGGAAATAACTACAGGATTAATAGGATATATAGATGCAGGGGTAAACAA<br>TTAATCACACAGAGTAAATAACCATGAACCTGTAATGATTTTTTCATGTGCTTTTTTGAGGG<br>TGAAACCGTAGAATTGAGAATACCCATATGAAATTTCAATCATGAATTTACCTCAAAAAAT<br>ATTTTTTAAAAAATAGGAAAAAATTACCTAAAGATAAATCAATCGTGAAAGCATGCATTTT<br>CCATAGTGTGCACTGTTGCTTGTAGCTTGCAAAAAAGTTGTAACCAGATTTTCAGGACC<br>CTTCATCAGTGCCATTCTTTTGTGCAACAAAACAGCAGGTGACACTTTATATCTTCTCA<br>GGCACATATGGCAAAATCTGCTCCCAACCGTAGGATCAGAGAATGAACGATCCCGATTTAC<br>CCTCTGTCGCCGCTGCCTTTCATTCA                       |
| 76 | 38623725 | 38624255 | 531 | - | AATCATGGCGCTTGGGTTGGTGTGATGGATTGGTAATTGGTATACCTTCTGTGGGTTTACA<br>TAATCTGATATACCAACTCTGTCTATCGATAATTTCAAAGGTAATTAGAAGCGGTTTTAA<br>GAGGAAGGAAATTGTGCAGTATAACATCGAGATTGTTTTATTACAGTATTGGCAGATTTT<br>GTATCACTCTGTTAGGAATAATCAATTGGGTATACCTTCTTGATTATTTAGTGTTTAAATTT<br>GGAACAAAAGCAACGTCGTATTATTTGAGCTTAGCTATACATTGTCAAAAACTCGGAAGT<br>GCAAGCTTATATTGTGATCATGCAAAAGTTTAGTAAAGTCAATATCTGATTCTGTACTATGT<br>ATTGCAGATCGTCTTTTTTCAAAAATAGATCCTTGATTCTTGAAACATGGTATCTCCGG                                                                                                                                                                                    |

|    |          |          |     |   |                                                                                                                                                                                                                                                                                                                                                                                                                                                                                                                                                                                                                                |
|----|----------|----------|-----|---|--------------------------------------------------------------------------------------------------------------------------------------------------------------------------------------------------------------------------------------------------------------------------------------------------------------------------------------------------------------------------------------------------------------------------------------------------------------------------------------------------------------------------------------------------------------------------------------------------------------------------------|
|    |          |          |     |   | GTGAAATGTCAGTAAGCAATCCATTACGCTTCCAAGGCTTTCCTTGTAAATGTGGTAAGCGA<br>CCTTTCACAAACCGCGGATGGACTTTTTTCCCCATAA                                                                                                                                                                                                                                                                                                                                                                                                                                                                                                                        |
| 77 | 38642005 | 38642535 | 531 | + | TGCTGTAGAAACGGAAAAGCCCCGCGCCATGCAACCCTCGTGTACGCAACGCACGGATCAT<br>ACTAGCGAAACAAGCACAGATACCGCTCGATCCGCGACCGCGGTAACAGTGCACGGCTG<br>CACGAACGCACCCGGCCACCCCAACCAACGGACCGGAAACAAGAAAAACACGGCAGCTA<br>GCTAGCAAAACATGCAGTTTTGCAACGGGCAAAATACGAGAAAAATCCGCGACAATGTGTG<br>GTTGCCGCAATCAACCGTCAATCCACGCTGTTTTGCGTTGCCGCATCGCAATTCAGTTGG<br>TTAGCTCAAAATGGGACGAGATGGTACTCATGGTAGTAGTAGAGATTATATTCAACTCT<br>ACTGCCGACCAAAAAATAATCTCACAGCAATTCAATGAAAAAGTTTTGAGGAAAAAAA<br>TTACAATGAGTCATTTAGGACCCACCACTAACAATGCAACTATCTTCTCCTCGCTCCGTTCC<br>TTCCGCCGCCCGCGCGCGGTGGCGGCGGCGGCGGCTCCGCCG                                                      |
| 78 | 38839961 | 38840463 | 503 | + | CCGGAGTCGCCATCGTCGCGTGCCCCCGCGCTCGCCATCTTCAACGATGGGGAGGAG<br>ACCGAGAGCTTGTCTGATTTGGGGGGAGATAATTTGGATTTGGAGGGGAGAGGATCAGA<br>GGAGAGGAGGGAGGGGTTCAAATAGGGGCGGCGCGATGCGGCGAGCCGGCGCCGTCGC<br>GGAGCCGAGGCGAGGCGGCGTGC GTTGAGCCGTTACGCGTGTTTTTTTTTTTTTTCATT<br>TTCTTCTATTTTTATTTATTTTAATGTCTAGTGGGCAAGTGGGCAACGACGAGTCCAGCC<br>AGAATCCCATCCCCTTCAGCCCTCGTCGCCGCGGCGGCGGCGCCGCTCGTCCACCGC<br>TGCTGGCGAGGGGGCGGCGGATGAGGCAGGGTGGTCCAGATCACGGGGCCTCCACTCCA<br>TCGTCTCCAATCCCTCCCGAGCGCGCTCCCCGACCCGAGCCGCGCGGATGTGGCGGCC<br>GGCGCTCGCCATGGTCGTG                                                                                        |
| 79 | 39017588 | 39018179 | 592 | - | CCACATTATTAACAGCCCAAAAAACGGACAAAGAATGAGAACAAGCAAGCCAT<br>CAACCACCCTCTCTCCCTCTCCCTAATTAATATCTTACCCTTCACTAATCACTACCTCA<br>TAGTGACCCTTACTTAGCTAATTGCCTAATCACAATTAGAAAAAGAAACAAAAAAGCAAA<br>AAAAAATCATCAAAAAGCAGCCAAATACTCCTCCTCATGTAAGCTGTATCCACACCGAC<br>GACGTCCACTCCTCTTCTCCTCTCTCCTCTCTCTCTCTTCTCTCTCCTCGCGAGAT<br>CTGTGGCGTCACTGACCTAGCTTGTCTTGCTAGCTGCTGCTGCTGCTCGGCGGTGGCGG<br>TGTGTGTGGCAATGCCGTCTCTCCGCGATTCTTGAGATTGGTGGTGGTTGGGATTGTTGT<br>GTGTGGTGTCAATGGCGGGAGTGATGGTTTGAGAGTTGCGGTGGCGAGGAGGCAGCTGC<br>ACCAGCCGTTCTTCCCGGATCAGTCGTGCTGCCGCCGACGCCGGCGCCGCCGCCGCCG<br>TCCGCCGTTCTTCCGGCGCTGCCGTTGCCGCCGCCG            |
| 80 | 39042251 | 39042840 | 590 | - | GGGGGGCAAGTAAAAAATAACAACTTGCAAGTTATCAGTTTTAAACGCTGAGGATG<br>AAGCATCCCGGCTTGTAACCTGCATATTGGTCACACACTACCGGTCAAATTAACAGCCAAC<br>AATCAACTATATCCATTAACCTGATGTTCTAACTACGGAGTATATCAGAGAAAACATGCTT<br>CTATTAGGAAAAAATAAGCACTGAAAAATACATATTGCATTATTATCGACTGCAATATAAT<br>AATGATGCACTAACGAACCTGATGGATATGGAAGGGAATGCTTTTTTACTAATGACCAAA<br>ATATCCCTCCTTGAATAAATGGCAAACGATTCAAATGGAGCTAACGGGGCAGTTTGT<br>AATACTTTCACCATCACCGCAATCCAGCAATACGCTGGAAACGTGAAGATTGCAATAAT<br>TTCCATTGCCACCCTACTTATCCCTATTTACCAACGACCCCTCGTCTTCCACCTCGAGCC<br>GCGTCACTCAAACCGCAAAATCGCGCCTCTCCGCCATTCCAAACCCCTCGCTCGGCTCG<br>CCTCTCCCATCCGAGCTCCTTCTCCGCACACGGCCA |
| 81 | 39124688 | 39125264 | 577 | - | AAACTAATTCTATCTATTTCTGAAGGAATAAAAAAATACTAGAATTCTAATTTTTCAAAA<br>ATTTTCTCATTGAAACAATCAAAAAATAAGAATAGGTTTTGTTGGTTAAAGTCAAAAAGTTA<br>ATGAAATAACTTCGTTACCTAGTTATTACCTAAAGAAGGACTTTTTATTAATAATACAAAAA<br>AAGATTGAATCATTTTACTTTAATATTTTTTTGTATTAATGAAGCAGCTCCCTGTTTCGT<br>AACTCAAATTGATTGGAATTCAACCTGCTATGATCCCTCCTGCCGAGAAGGGTGGAAGGA<br>CAGGGGAGCACGCTGTGGTTGAGCTAGTGCTTCATACCTTACTGGACAAGGAAGGAAAG<br>GCAAGGAGGATCAGTACGGGAGAGAAAGTGATTTAAGAATGTGAATTTGATTTGATAAGT<br>AATCAAGGCAATTAGCTTAGGTTTCATCCGAATCCATTCCATGTTTCTTAACAAGTCCTTA<br>AACCACTCGTGCTAACAAGCCATTCTCTCCGAAAGTCCTAGAGCTTTTCTGGTCCATATGC<br>AGCCTTGAAGAATCGAGATGCC    |
| 82 | 39160475 | 39160994 | 520 | - | TAGTCAAGTTCTAAAATATGTCTTCTTATTTTCGTATAAAGATTGAACGGACATCAAAGTA<br>AGCAAGCACAAATTATCCAAGTGCTAAAGATAAAAGCAACACTGACAAAACATGTGCAGC<br>ATAATCTCTTTTTTTTTGTGCAACTAGAAGAGCATAGCCCCCCCCCCCCCAAAAAA<br>AAAAATCCATTAGCAGAAATGAGCATTACAAAGTTTTACAACATAATCTAATTATGTTTTG<br>CAAAAGCATGTAACAAAGCACCATATTTACCTAGCACGGGTCCATTAACACC<br>CTGCCGATTGAGCCAAACACATGGAACATAAAAGGATTCTTCCAAAATCAAGAAGTGGT<br>CCCTGCAAGGAGAACATGTAAAAATGTACTGGCAAGACTGAAAATGACAGACCAAGTAA<br>ATGAGTCAGGGAATAACTGTATAGGCAGCTTCAGCAATGGATGAAAGAGAACAGCCTCT<br>TTAATGAGATCCTGAGGAGCCTCTGCTTGTCT                                                                            |

|    |          |          |     |   |                                                                                                                                                                                                                                                                                                                                                                                                                                                                                                                                                                                                                                         |
|----|----------|----------|-----|---|-----------------------------------------------------------------------------------------------------------------------------------------------------------------------------------------------------------------------------------------------------------------------------------------------------------------------------------------------------------------------------------------------------------------------------------------------------------------------------------------------------------------------------------------------------------------------------------------------------------------------------------------|
| 83 | 39174471 | 39175054 | 584 | + | CCACGGCTAAGATTGCTCAAGATGGATTGGGAAGGTCAAATGGAACATTGTAAAAAAAT<br>ACAATAAAAAAAAAAAGTCAATCCTCACTATGAAACATGTGTCCAGATTTCGTATCTATGATTGA<br>GTTTTTAAATGAGATGGATATGGTACATTACATACGCACGAATACATTTGCACGCAAATAT<br>GCAGCACCAACTTGAAGAATTATCTTAAAGAAAAAAAAAACCAACACTTCCCCCCCCCTCC<br>CCCCAAAAAAAAAGGCTTGAATAAAAGGAATAAAAGAAAATGTGGACTTTTGAATGATC<br>AAGGCATCTCCTAATTAATGGCAGAAAAACACAGTGACACTGACACTGAGGTCGGTCGTT<br>GACCACCCCCACCCCCACCCCCAAAACGGCCAGCATCAAGGGTCGCTACACGTCATCCAT<br>CCATCCATCCATCCATCCACGCGGTGACGCGGACGCGCCGCGATCCTTCACGACACCCCT<br>TCCCCACCAATTAAATCCTCAAAGCAACCGCAACCGCGCGCGGCCCGCGCGC<br>CCGCGCCGCGCGCGCGCGCCCCGCGCGTGGCCT          |
| 84 | 39187869 | 39188419 | 551 | + | AGCAACAATTTGGATGGCATGGTTGCGTGCAGCCGATATATATCTACGAGACTATCATCA<br>AGGCAGAGCATGATGCAATCTGATCTGTGACGAATTAATATGAGCAACCGATCATAATAT<br>TTTTGGAGTCGTTTTAGGGGTGTTATGCGGAGGATCGAGGACAGTGCGCGGGGGAGG<br>GGATGATGATTTGGATGGACGATAATCCGCCATGTCGACCTGCCTAGCTCCCGAGCTCTT<br>CAATTCGATCGATCGATCGGCTCACTGTAGCCGACGTAGTCCATCTCGATCGATCCCTAGCT<br>AGCTCTCCATCTCCAAGGCTTAATTAGCTGACTATGTTGCCACTGACACTGTCACCCCCTAT<br>CTCTTCTCTCTTTCATTGGTAATTAAGTGGGGGAGAGTGATAGAGGCAGCAGAGCCAGAT<br>GCTGATCGAGATTAATTTGACACTGATCTCTCTCTCTCTCTCTCTCTCTCTCTCTCTCT<br>CTCTCTCTCTCTCTCTCTCTCTCTCTCTCTCTCTCTCTCTCTCTCTCTCTCTCTCTCT                                              |
| 85 | 39320792 | 39321360 | 569 | - | ACGTCTTATAACTTAAAAATGGGAGTAGTAATATTCATCATTATTGTTCTCTGTGACGCCA<br>TTTAGGTTTGTGTAATATGTTCTCTGTCATGTTGCACTTTGGCAGAAAAGGAGCACGATACA<br>AGTGTATGCTGTTAGATGAGCTAATTAACAATAAGAACCTACACAAAATTGTAACAAC<br>AAGCCTCTAATCAGTGGGCTTATTTATACAAGTGTTTCATGCTCACACAACGGCTTGAACAG<br>CATCGTGTGTTGCCCATCATCCATGAACGACAATGGTGCTCGATCGAGAGCTCTTTATTAC<br>GTCCAGCATCGGTGTCTACCTCTCTCCGGCGCGCCGGCCGCCACCGGCCACCGGATGCCGG<br>CGTCTAGCATTTCAGCACGAGGCGGCGATGACCGGCTTCCCCTTCCAGCCGAGCAGCAG<br>GCAGCCTTCTCTCCGCCACCGTGATCCCGCGCGCGCGCGGCGTTCCTCGTCCAGCCGCG<br>GCGCCTTGCGCGCCATCTTGATCGGCACCGACTGGAACCCGCGCGGCTCATGCGGCGGC<br>GCCAGTGGTCGCGCGC                      |
| 86 | 39346711 | 39347231 | 521 | - | TAATAATAAAATATTGCGTATTAATGCTACTCTAAAGGAAATATCAAAGATCAAAGATTAT<br>ATGTTTTAGAAATTAATTTATTGTCACTTAATGATAAAATGTTGCCTATTAATGCTACTCTAA<br>AAGAAATATTAAGATCATATGTTTTAGAAATTAACCTGTACTGTTCTACAGGCTGTGAGCA<br>TTACCAATGCTATTTTCGCTGTTATTCTGCTTGGCATGCTTATCAAAAAGTACAAGAGCTAC<br>AAGGCTTACAGACAAGAGTATCGCTCTCTTCTCGTCAATTAGCGAATGTGTAATTTAGTA<br>AGTCAATGCCAGCTATGAGAGCACAAGCATGCATTAATTTTGTGTTGGGATGTTGGTAC<br>TCAAAATCGATTAGCTATTTGATCCGTGGAATCAATCTTGCATGTATGCGTTCAGACTTTAG<br>AATTCAGATACTGGGCGTGAGGTGTAGCTGTAATCAACAGCTGTATTCTTCTCGCTGGT<br>CGTTATTGCCGCGGAGCATTTGCCT                                                                        |
| 87 | 39632140 | 39632733 | 594 | - | ATACAAGAAAATACCAAGCTAATGTACTGTATATCACAGTTTGAGACTCTTGTTTTAGTCCT<br>CTAAACAAGATGAAACAATAATGAAGAACCAGCCAAATAACAAAAGTAGCTAGGTGGATT<br>ATACTTAGTAGTTGATGCTTTCTAAAAGAAAATGAAGTTAAAGACTCACTAAGCACTAGT<br>TTTGGTTGCTTTGGCCATTGCACTGTTGCTTACTTGCTTTCCCTATTGCCTGGGAACAATCG<br>CAGACGCACGGCGACCAGCTTCGCTGTTGCCGTGTCTCGAGCAGCCGCTCCTTGTTGTCCT<br>TGTCGGCTGCCATTGCTACAATCAGGCCACCTACACGGCTGACGATGCTAGCTAGG<br>TGCTCCTCTCTCTGCTATAGATCAAAGCTGAGGTAATGACAGTCTGCCATCGTCACTGC<br>GCCACCTATGATTTGCTCCGCCGCGCGCCATTGACGCTACCTGAGCCACCAATCCGCCGG<br>CAACCTCAAACACGCCAAGCTCTAATTAATCAAGCAGCTAGCAGCCAATGCCACCACTCCA<br>TCAGCCCTAGCACGGAATCGGTGATGGGGAATTGGGGA |
| 88 | 39641227 | 39641815 | 589 | + | GAATTTTGGATAATCTGCTTCAACCTTCAATGTTTCATTGCTTCTGCACCTTATTCTTGTGA<br>GGTGATACCGTATTTAACCATTGTACTACTGTCCTGAGTCTGTGGAAACAGTGGTGATT<br>AACCAAGGAACCAAAGCTATAAAGGTACATTTTCTTACCAACTTATTTTGTATTGCACT<br>ATTGCCAACTTAAAAGTTGACAATTTAATTATACTAGCTTAACTGACTATATGATTATTT<br>TCCATTGCATTGCTGGCATGCTGCTGTTGATGATGAGCTTCTTCACTGAGCTGAAGGCCTA<br>AGCCCTGGAATTGGAGGTGCAAGTTGCTATGTTACGCTTTGGCATGTTGGCACCATCAAA<br>CAAAAGGTAATATAAAATATTCAAATCCTAAACACATGTATTTTCTCCAAGTTGGCTGTTG<br>GCATGCTGCAATTTGCTATGTTATATAAATGAAATTGATAAATTGGCTTAGCCATTGGATA<br>CAAGTTGCCTGCTGACTCCTCCCTCCCTAGTCAGACCTAGGCGCCACCTAGTTGGCCCTAGG<br>CGTAGGCACCACTCCCGCCCACTAGCGT       |

|    |          |          |     |   |                                                                                                                                                                                                                                                                                                                                                                                                                                                                                                                                                                                                                                                                                              |
|----|----------|----------|-----|---|----------------------------------------------------------------------------------------------------------------------------------------------------------------------------------------------------------------------------------------------------------------------------------------------------------------------------------------------------------------------------------------------------------------------------------------------------------------------------------------------------------------------------------------------------------------------------------------------------------------------------------------------------------------------------------------------|
| 89 | 39707555 | 39708142 | 588 | + | GACCTAAACGTCTAACGACCTTTTCAGTTTTACCACAACAACAATGTGATCAGGTACAGTTGTATTGTGGACAGAAATACAGAATGCATGCTTGAATGCAGGATTACCAACTTCTTTGGTTTTCCGATGAATGCAGCATCACCTACTTGTGGCTTCTCTAATGATCGCGTT <b>CACGAC</b> TTAAGCACAGTTTTAACAAAGCAAAGAAGCAATAACTGACCTAAACACTCCGGAAATCAAACACAGAACAACCAGAAGCTTAGCGTTCCGGTAGAACACAGCCCTCCGTTCTGCGCCGAGAAGATGGACGCTGCGAGGAGATGGGGTATCGCGATCTCCGCGAGCTGCAACCACAACCA <b>CACGTC</b> ACCGCGTTTTAGACCCATCAACGAGAACTCTGAGCAGCAGAGGTCAAACCCAGAAATCGCCATTACCGCAGCGCCGACGAGGGACGCGAATCCGACGAAGACAACCCATCGGTGCGAGGCGACGAGCGCCACATCCGCCTGAGCGCGGAGGCGGCCGTGGCGCCGCTGGCCTCGGCGCGGCCGCCCGGCCCTCTCGCCGTCCTCGAGGCGCCACCA                                                                         |
| 90 | 39708313 | 39708880 | 568 | - | TGTTCCAATGC <b>CACGAC</b> CACGCACGAAGCCGTTCTTTCAATCCTTCTCCGTGTCCAATCCTAAATCCAACGACGATTATTCTCTCCAGAAAATTGTTTTAAATCCCCAAAATACCACCACCACACCACATCGCCTCATTCCATCCATTTCTTCTCGTAGAAAAATCGCAAAAAAAA <b>CACGTT</b> AGGAAAAAGAAAAAAAAGAAGCACACGCGAAAAAGTGGAAGAGAAAAAGGATTAAAAAAGCCGCGGAAAAAATACAATTTAGCCGAGAAGGTAGAGACGTTACGGCGCCGGTGCCGCGCACGGCAGAGCAACCAACTCCGGCGAGGACGACGCGGCCTACGCCTATTAAACCTCGCCGGTGCTCGCCGAGGCGGCGGACTCTCTACCGGCGAACGCGGAATCGGAATCTGAATCGGGCGGTGGGGGTGGAGGGGAGGGATAGAGGGGGTT <b>TGACG</b> AGAGTGGAGAATGCCGACTCCGGCGGCGTGCTCCTACCGCGGCCACCGCTCGGCGGCGCTGTCGGTGGGCGTGCGGCGGTGGGGCCAGGGCGCCGT                                                                                         |
| 91 | 39773082 | 39773671 | 590 | - | TCCTAAAAACCAAATAACAGAGACATCACATCAAAATATTGTTACAAAACCTAGAACTACAATTAAGCACATTAGCATAAGCTCGATAGGAACGGTCACCTCCATAGCCTCCGGAGAGCGCGTCCACCAGCTCCTCCTCTGAGAGGACCCTCAACTCATCTACGTGCAGAATCCACAAAA <b>TGTAC</b> <b>AAACCA</b> GAACACGAATAAGCATATGAACAACATGACAGACACTGGGGGATTTCTCCACCTGATACGGCGGAATTTGGGGGGCTTACCAGAGCTCTTCGTCGAATTCATCACCAGGATCGCCCAATTCATCTTTAGCGACTGCTCGCAAAGTAACACAGAACGCGATTACACCAAAGCAAGGGCACGGATTGAAGAGCTAGGGTTTGGCGGTGTGCTCAAGGGGATTGCAACCTGCACTCGTGGAGCGCGGAGGACATGAACCTCGGGGACCGTGGAGACGGGTCCGACCATGAAGGGGACGAACACGGGCCCCGCCAGAGCGAAGGGCATGCGCCGCTGCTCGCCGGCGGCAGAGCTCTCCGCCTCCTCCCCGCCGCCGCCGCCCATCGCCGTGTG                                                                       |
| 92 | 39783698 | 39784289 | 592 | - | GGTTGGTATTTTTAATTCGTAGCCATTGATCCAGCCACAACCTACGTAATAATTGGTT <b>TATA</b> GCTTCTTTGTAGCATATGTTGGGATGAATTTCATTTTAAAAATGTGTATTGCTAGATTCCAAGAGCATAAAAAATTTGCGAAAAATTAGGTCACCTAAAAATTACACATTCATAAGCCTAAAACTGCATCGGTATGCAAT <b>TATACA</b> ATTTTACTTATTTTTAACT <b>TATA</b> ATATTATTCT <b>TATATATAG</b> TTTTGATTTATTAATTTGTATCTGAGCTTGAGTACTCTAAAAAAAATTAATCTTTATCTTTCATGTAGTTTGGTAATATTTATTTTTAGGTTAGAATAGTTTACAAAGTAGCGTGCCTCGCT <b>ATA</b> AGACATGT <b>CACGTG</b> TGTTTGTATCTTT <b>TATATAT</b> GATATCCT <b>TATA</b> ACATGCTTTAAGGCATGTT <b>TATA</b> CTTGAGTATGAAGTATGAATCTTTTCACTCCCCCCCCCTCTCTCTTATTCCCTTTCCCTTTTAAAGTTGCCAACATGCAAGGTCAATTAGCAGCACTTCTCTCACGCATATGCAAGTAGCTAGTAGTGCATGTGCATGGGCGA |
| 93 | 39903842 | 39904399 | 558 | - | CAGAATGGCTAAAAAAGACTTTTAAACATGC <b>ATTATAT</b> GTGTTGATGAGATTGTGTGATGAACAAGTATGGAAGTAAGGTGAATGAAATATTTTTGTTAAAAACAATGATGCAACCAGCATTTCTTTGAAAACAGGATACTCAGCATTTTGGCTTATGCAATCTTTGTGTGCCGGCTTGGATCAACAGAGAGAACTTTACAGAGAGGTGATCTTATGGTCCTCAACCTGTGCGCATGGCTTTTACAAAGCACACACACCAAACAATGGTACAAAGGAATTTTGTATGTGGTCTCGTCTCCACTCCAATCAAAGGTTAACTAAAAAGGCCATGAATGACACAGACAGAGAAGAGTACAGCAAGTAAAAAGTTTAAATGCCATTAGCTTAGTTAATTAATGAAGAGCCATGAATGAGAGAGAAGTGTGAAAAGTTTAACTAGTACTAGTAGTACTAGTTAATTAATGAATAATTATTTGGAGCTTAAGAAGGGGGCCAGGAGAGACTGGCCTGTTCACTGGTTGCAGTCCTCCATGCACAGGGAGATG                                                                                                                  |
| 94 | 40125259 | 40125760 | 502 | - | TGCTTATCTTTATTGGATCAGAAAGCTATCTCCACCCTGAAGCCCAAGTCACCTTAGAAAA <b>GGATATAT</b> GTGCCTCTGAATAAAAAAGGCAATGAAATGATGGATATGTGGAACACCACTAGCATAACTGTATCTGCTAACCAAAACATGCTATTATTGTCACCAAACTACAATAACTTTTGTGGGGTTCTGC <b>ATATAT</b> CAGCGTTTTATTTATTGTTTGATTAATTTTGTATGTGTTCTTGAGAAATTAATGCTTTTTTTCATATTGAAAATCAATCAAGTTAACTGCATCCCAAAGGATTTTTTGGGGCAATTTTCAAGAGAGTGGAAGGGAACCATATTGCTAAAT <b>AAACCA</b> TTAAAACAAGGAAAAATTTATCTGAAAAGTTAGAGTTGGAAGGATGATGGCAAGGTATCCACTCGATTTGGATGACATTCCTTTGAGTACAACT <b>TATA</b> AAGCATGCAACT <b>TATA</b> AATGCTTCCACTTGTCATATGACT                                                                                                                                   |



[illegible]

|     |          |          |     |   |                                                                                                                                                                                                                                                                                                                                                                                                                                                                                                                                                                                                                                                                                                  |
|-----|----------|----------|-----|---|--------------------------------------------------------------------------------------------------------------------------------------------------------------------------------------------------------------------------------------------------------------------------------------------------------------------------------------------------------------------------------------------------------------------------------------------------------------------------------------------------------------------------------------------------------------------------------------------------------------------------------------------------------------------------------------------------|
|     |          |          |     |   | ACAAAAGCCGAGCCTTTCTTCTCTGAAAATTGGGTACAAATTCAGTGTTCGCAATCAA<br>ATT <b>CGTCA</b> TTTCGCTCAGAAATTTTT <b>TATATA</b> AAAAAGCTTCTTTTGGTTGGAGAAAAAG<br>AAATTCATGAAAAGAACCATACAAATCTTGCTGCATTTTCTCATAGAGAAAAGATTCAAAT<br>GTGCAGATAGGGTCGGGGACGTACAGCA <b>ACGTG</b> TACAAGGCGAAGGAGGTGGAGAGCG<br>GGCGGGTGGTGGCGCTGAAGAAGGTGAGGGTGGATGGCGTGGGCGAGGCGGAGAGCGC<br>GCGGTTTCATGGCGCGGGAGATCGCCTCCTCCGCCGCTCGGCGACCAACCATCGTC<br>CGCCTCCGCGGCCT <b>CGTCA</b> CTCCCGCTCGCCACCGCACCTTCCCTCTACCTCGTCTTCGAC<br>TACATGGAC <b>CACGAC</b> CTCACCGGCCTCGCCGCCGCCCTCGCCGC                                                                                                                                                |
| 102 | 40591061 | 40591638 | 578 | - | ATCATTGTCCATCACTGCAAGCCTGCAATATGATATCTACCAAATACTCCAT <b>CCGTCC</b> CTA<br>AAATACCAACCTATTAACAAACATAATATTTCTAAGACAACAAAT <b>TATA</b> AAGAAACCTGT<br>TCAGATT <b>ATTATA</b> <b>TATAT</b> GAAATATCACATCCAATATTAATTAATTTTTTAACGGAGA<br>GAGTACTACCTGACAAAAAAAACATTCTAGTCTCTACCAAAA <b>ATATA</b> AATAATAATAA<br>AGATTTAAAA <b>ATATA</b> AATAATTAATAATAATTAATAAACAAGCGAG <b>TATA</b> AATGAAGT<br>AAAACGGCGAGTCGAGAGTCCAACTGCCAAACCGCCGTAGCACGAGAGACAGTACACGA<br>GACCTTCCCGCTCCTCCTCCTCGGC <b>CACGTG</b> GACGTGCGACCAACCGCCGCCGCCGCCG<br>CGCCGGCGACCTTCAT <b>GACG</b> CGCCGCCATGGATGCATCCTCGGTAAGCTCGCCGCCGC<br>GCCAGGCTCCTCCTCTTCTCCCGCGGCCGCCGCTGCCTCCGGCGCCGAGGAGGAGGA<br>GGAGCGGGCGAGGTGCAGCTCGCGC    |
| 103 | 40601295 | 40601872 | 578 | - | AACCAAGCTGCATGTGCTCCAATAGTAATTAACAATTGCAAGTATTTTGTGGAGAGATTCT<br>TTAGAAGACAGTGTGTTAATTT <b>CATATAT</b> CTGAAAGAAGCACAGTTTGTGTTTGTGCAA<br>ACGATTGGTTTAGTTAACCTAATTTTACTAATCTAGCTCACTCCATCAACAATTAGAACAC<br><b>TATAG</b> CTAGTGTGTTAATCCATACATCTAAGAATTAACGAGATGGAATCAATTTGCAGCT<br>GAGTTTGTGATCAATTACCTCTCCTGCGCTTCTGGAAGAAGCGCACCAACGATCTCTTG<br>TTCGCAATGGGCAACTCTGCACAAACAGGCGAAGAAATTAGGATCATTATCGCTTAATTAA<br>TCCACCTTTTAATTAATCTGAAGACATGCATGG <b>ATATA</b> AACCTTAAGCAGACGATCGATC<br>GACCTAGCTAGCTTCTAGCTACCTACTTACCTCGCTTTAGCTTCTCAGCAGCTGGTCGCCG<br>CTGCTGCTTGCCGATATCGCCGCCGCCGCC <b>CGTCA</b> ACTGCCGCCGCCGCCGCCGCCGCCG <b>CCGT</b><br><b>CCTCCTCCTCCTCGCCGCTGCCA</b>                  |
| 104 | 40637308 | 40637889 | 582 | - | AACTCAGC <b>ATATAT</b> GTCAAACATGCGACGACTTTGCCTTTTTTATTTTCTCAACAAACAT<br>GTGATAAATCTCAAACGAAAT <b>TATATTTATA</b> TTACTACATT <b>GTATA</b> TTGCGAGTAGCTT<br>GTTGTCGTCTTTATTTTTTTCCAGCTGTCCGCATCAGTTACTCCAGGTCAATGGGTGTAA<br>AAAATACTAGTGCTCCTTGTGTCGTTGAAAGTCAACGGGTGTATCAATTTTTTTTAAGAG<br>AAGGGTTGGGTGTATCAT <b>GTATAG</b> TAGTAT <b>GTATA</b> AAATATCTGTAAAAATAGTTTAATT<br>ATGCTGTAACACATTGATTGACGACAAAAACCGCTCAATTTAATTCTACTGTA <b>ACGTG</b> GA<br>TAATTATGCGGACAAAACGAATACGGAATACGCCTGCACCGAATACGCTTTCGCCGTGTCG<br>AAGCGTAATTCTACTG <b>TACGTG</b> GTACGCCCAACGGCAGAGGATTCACATTTTACCCGCT<br>TTTCTCGTCGGCGGGCGGCGACCGACTCCGAGGCGTGCCTCCCCTCGCGCGGCGACGATG<br>CCCTGCTCCGCGAGGGTGCAGCGCGCCG       |
| 105 | 41021900 | 41022493 | 594 | - | TTGCATGCATGTAATTTCCATTATTTCTTCTCAAATTTGTAAGAAAAAGAACTCTTTTCC<br>AAACAAGTTGG <b>ATATA</b> AATAATTGAATAGACAAATAAATACTGCGGGCGCACCATATTTT<br>TGTAAGGAAAGGGAAAGAATCATTATCTCATGTGGTGTGCGGGGAATGCTAGCCCTAC<br>GTTACAACATAACATTCCACACTTTTTCAACAAGATCGAGAAAATCCAATAACAAGTAGA<br>AAAAAACCCGCCGCTCAACGCATAAATAGAGCT <b>TATAG</b> CGGGTTCTCTTCAGCATAGTCAGC<br>CAATTCCCTTCAGCACAGTCGGTAACAATATCACGAGGTTTGCTACGACGGTGCGGCCCAT<br><b>TTATAC</b> CATACGACTCTCTTCT <b>TATA</b> AGGGAGATAAGATACATACCCCTTTTCCACCAA<br>AGAAAATGAGCCGCGATCTCAATTTCTCTGGATTAAACCAATTGGGTGCGCTCCAACCCATG<br>CAAGGGCTTCTAGGGCGTCGTCG <b>CGTCA</b> ACCTCGGCGTCGAGAGATCGAGACGGCGGC<br>GATGGCGATGGCGGCGGCGGCGGCG <b>GTACGATGACG</b> AACGGGC |
| 106 | 41277400 | 41277993 | 594 | - | CTTGCAATCAAACATGCCTAAACTTTTCTTTGTTA <b>ATATATA</b> CTACTCAGAATGCCATAT<br>GTGCATGTCTAATGGTCCTTGATAATTGGTCCCAGAGCCACAATCATGTGGTGAATATCATA<br>ATTAAATCATACAGAGAAATCATGTGATGCACAACTAAACCAATTAATAAGGAG <b>AAACCA</b><br>TGTGATGCACAACTAAACCCCTAATAAGGAGTAAATATCCCTGATGAACATCACTATGTTAG<br>CTGTACTCACTAGTTCTTGACAATTGGTCCAGTGCCACATACCCCTTTATCATCATGGGT<br>GCCATGAGACAAAGGCATGATGGCATTGGGACTAAAAACCTCACCTGTTAGTGGGTCTG<br>TGCAGGGTGGGCAAGTGCAAGAGCTAGGTAGGGGCAGAGATGAGAGAAGCTAGCTAGG<br>GAAGGTGGTGAAATTATGCAAGAAATTTAAGAATAATTGG <b>CTATATAT</b> GCAGGGGGT<br>GTAGGCTAGGCCCATCTACTCTGTCTCTCTTCTACTACATTCCACCCTCAATCCTGCC<br>CCCTGTCTTGCTCCAGCCCCTGTCAGGGAGGAACAGCAGGT                                  |

|     |          |          |     |   |                                                                                                                                                                                                                                                                                                                                                                                                                                                                                                                                                                                                                                                                                                      |
|-----|----------|----------|-----|---|------------------------------------------------------------------------------------------------------------------------------------------------------------------------------------------------------------------------------------------------------------------------------------------------------------------------------------------------------------------------------------------------------------------------------------------------------------------------------------------------------------------------------------------------------------------------------------------------------------------------------------------------------------------------------------------------------|
| 107 | 41313576 | 41314170 | 595 | + | CGATCGAGAGAGAAAAGCATCGCGTT <b>TATATA</b> GAGCTCA <b>AAACCA</b> AAAAGGCCAAATCTGTGC<br>TCGT <b>TATAG</b> CTATTCAAACAGCCACCCAAAAGAAAAGCGTGAAAGTGCGCATGACTCCACGC<br>CATCCGGAAGGCAAGAAATCAGGAAGAGACCACATTTGCGATGGCGGCGAGATGCAAGC<br>GTATGATCCAACAACCAAAATATTGTTGGTTAAAGAAAAAACAACAAAAAATAGTAATACG<br>TTTCGTCTGTAAAATTAATTAAGACTCGGCAAAAGAAACGAAAAGATGCAGGCGATAGATA<br>AAAGTCATCGAGGAATCGCGAGGCGACGAACTAGACCAAGCCAGCCGCAAGGAACCGCG<br>GTGGTGGGGGGGAGGCCGTACCCGCTGGGGAGCGCGTCGACGAAGGTGAGCAGCATCTT<br>GAGCTTGCTGCCCCATCGGACGCGAGGCCGGCGTGCATCTCGACGACCATGGCGT <b>CAC</b><br><b>GAC</b> CTGGCGCAGCCTCGCGGGCGGCGTGGCACACCCCTCCTCGAACTCCCGCAGCAGCGC<br>CACCGCCCGCCGACCGCGCGCCGCGCCGACGCCCTGCGCGCCACGAGCGCCGCGG |
| 108 | 41328214 | 41328798 | 585 | - | AATTCGTGTGATTTCTTCTAAAATCATAGGTGAGATCTACATAGGGAAGTTCAAT <b>ATTAT</b><br><b>AT</b> CTCTTCTCT <b>ATATAT</b> TTCTCTTGGTTGGTCAGTCTTTTTTGTACATAATTTTCTTAGC<br>GCTTTCTTT <b>CACGTG</b> GG <b>ATTATA</b> AGGAAAAAAGGATAACGACTGTGACTACTTTTAAGA<br>CAGTAGAGATACGTACTTAAATTTAGAAGATGTTCCGATCTCCTGTGTAATTACTGCGGGT<br>CTTTTACTTGAAAGAATGCCTTGATTGAGTCAGGACTTCTGCGTGCATTGGTAAGTTTGAAG<br>ATTGTGTGGGCATGGGTGATGGATGTGCCTGTCCATGATACGGTTGTAAAGCCGACAAAG<br>CCTCTATTGGCCAGAGGACAAAGAGCTGGCCTGTACTTGAGCCTGGCCTAAACCCCCCA<br>GTGATAAAAAAATTACAACCATCAGTAAATTAACAAAAAAGCGCTCCTCACTGATCAG<br>TCAGCCAGTCCATCCATTTTCACTTGTCCAAGTCCAAGTCAATCCAGCTCACCTGCAGTC<br>TGGACCTGTCCACTGTCCAGCCCCCTCCTCGCT                          |
| 109 | 41761766 | 41762351 | 586 | - | CTTCACCGTCTTTTTAACTTGACACTACAAGTAATTGT <b>TATA</b> AAAACTTTGACAACGTACT<br>CATCTTTTATTAATAA <b>ATTATA</b> AATACTAAAAAGAGGTTGTATTATCAAAGTGGAGTACTTA<br>ATT <b>TATA</b> ATCATCAAAACATAATTCTACTATTTCCATTATCAAAACATTAATTAAGAGTTT<br>GCTTGTGGAAAGATAAAATCTCACTAATCAACAATGTCAAG <b>TATA</b> TGGGAATAGAGGAAT<br>ATTTAACTAGGCAAATTAAGTAATCATTTTTTCTATTGACCAAATAATTAGTACATTGG<br>AGGGATTCCAGTCACAGGCTGTCTGCAAAATCGATTTTCACAATGATC <b>ATTATA</b> AGAT<br>AGGGAAAATTGTAACCAGCACTGCTTGTAATAAATGTCCATACTAAAGATTATGCCA<br>AGTCTCATACCCCTCTCGGCCACGCTAAGTCCTTTACTCCTCTCTTCTGGCTCCCCAACCT<br>ACACCTCACCTGCTGCCAACTCTTCTCCTCCTCTCTCTCCAGGCCATTAGCGTTTCGG<br>CAAGCGCTGCATCCTCCATCCCTAGCC                                |
| 110 | 41767406 | 41767983 | 578 | + | AATATTTCCAACGGCAAATGGGGGATCGGGTAGTTGGTAAACATAGGAATTGTTCTTACAC<br>GGACGGAAGTGGGCCAGGCAGAAAGTCTAATCAGGCGCCGCCCTATCTCCGGTAGGTCGTC<br>CTTTAGCTTTGACCACGGGAGCCGTGGAAAAGTCT <b>GACG</b> AGGCTGAGCGTTTTGATCGA<br>GCCTCGTGATGGTCCGCGGATTAATTGTAGCGGAGCAAAAAAGTTGCTTGTTCGGGGC<br>AATGTCAAC <b>CGTCA</b> ACGATCGGGTTGTAGCGCACGCACGTAAACACTGATGGTGTGTGTA<br>CGCAAGTGGAGTTACGGGGAATCGCGCCGTTAGCCAAACGACCGGAGGCGCATGCATGC<br>AGGGATGCAGCCCGCAGGCAGATAGGCCATGCATGCATGAACTCGAGCACGCAACGCA<br>AACACGCAATCCACGCCTCGCCGCTGGCCCCCGCGCACGCAGCCCTGCCCTCCGCGGAGCC<br>GACCTGTTGCCTAAACGCAATTTAAAGCCCCCGCGTGGGCGGGGCCCTCCCTCCCTC<br>CGCGCTCGCTTTCGTCGCCTTCGCCCCGCGCCA                                                        |
| 111 | 41811964 | 41812551 | 588 | - | AAAAATGCTTATTAATAATGAAAAATCCGGTAGTACATGTCTACATAGCAATGGGCAAAATA<br>CATAATTAAGCTGAGTTCCTGATGAGACGATAATAACCTGTAAAAAATGCTAATTAGATCG<br>GGAAAAAATTGATGACTTACTTGACATGATTTCACTAGTTAAACTCCTGATCCTCAAG<br>TCCCGCAAATCTTTAGACCTTCTTTCAATAAGCAAA <b>CTATA</b> ACCCCAATTGCAAACCC<br>TAACA <b>ATATA</b> ATTCAATTCAAT <b>TATAG</b> GGGAATCGGTAATCAATCAATTGAAACACTATCTT<br>ATTGCTTCAAAAGAAATTAATTTGCACTAAATTTGGTCAAGAAATGTTTTCATACCATCACA<br>ATGCAGAAAAAGGGAGGAG <b>ACGTG</b> GAGGGCTTGATGCCTTGATGCCGCAACCTGCAATCA<br>GCGATTCTGCTCGATGAGGCGTGCTACCATGCCGTGCTGAGCACCTGAGCGGTGAGCCG<br>GTGGCCAGCGATCATGGCAAGTGGGTGCGCCGTGCAGTGCCTCCGCTCCGCGCTTCCAG<br>CTTCGCGCTTCTGCGATTGTTGGGGCGCCGGGCTAGGCG                         |
| 112 | 42043135 | 42043730 | 596 | + | TGCCAACATGAAATTGGTAGGTAGAGAAACATAAGTAGGA <b>ACGTG</b> AAGGTTTGTATGCG<br>TACTACTCCATCCTTAAAAAACCCTGCCTTGTAAGATTTAATCCTAACACAGTGGA<br>ATTAGAGTTTAGACGTAGCGTATGTTTAGATTCATT <b>ATTATAT</b> CCTAATACGATGTTTTTT<br>TTAAGATGGGGATGTATGTATGTGTGGAGAGAGGGGAATAGATACTCCGGTTGTTGTCA<br>TGGCAATCATTGTAGAGATCTATGG <b>ACGTCA</b> ATGAATAATTGAAGTCCCTCACGGCTGGAT<br>GACCAAAGGTGCGTTCAAGCATGAAACATGCCTGCATCCATGCCAGT <b>TATA</b> AGTAG <b>ACGT</b><br><b>G</b> CAGTACAGCAACGTCCAAATCCAAGCAATCTTCGATATCTAGTCATAGATTACGCTTCGT<br>ACACGGCATCTTAGCGGTCCCCAGTGGAAGGCTAATCCGACACCTTAAACACAGAAACG                                                                                                                         |

|     |          |          |     |   |                                                                                                                                                                                                                                                                                                                                                                                                                                                                                                                                                                                                                                           |
|-----|----------|----------|-----|---|-------------------------------------------------------------------------------------------------------------------------------------------------------------------------------------------------------------------------------------------------------------------------------------------------------------------------------------------------------------------------------------------------------------------------------------------------------------------------------------------------------------------------------------------------------------------------------------------------------------------------------------------|
|     |          |          |     |   | TTCACATGAACAGCAGAGAAGAAACACGAGTCCAAAAGTCCAAACCGGCCAAGCCACCAC<br>TGGAGCGAAGCTGTAGCGTGCGCCGCAAATGGGAAAATTAGGCCGCAA                                                                                                                                                                                                                                                                                                                                                                                                                                                                                                                          |
| 113 | 42055217 | 42055716 | 500 | - | TTTTCTGCGTGAGAAAGACACACCGGGGATGGATGATCACGTGAAGTTGGGTGAGCAC<br>CGCGATGCAGGCAGGAGCAGGAGTGGAGAGGAGAGCGTGTGTTTTCAGTGGAGTAGG<br>GGACGGCGCGGGGACGTGCGGCGTTGAGGGAGGCGACGGATAAGACGGCTGCGGTTG<br>GACCGGAGGCCGGCTGGTGCAGTGCAGTGCAGGCTTTAATAAGGTAAGGCAGGGGCACG<br>GCGGGGTGGTGTGGACCTGCGCGTCCGGTGGCTTTTGCCAGGGTTAGTTATTGTGGTC<br>GTTGTCAGGACGCGTAGATAAAAAACAAAAGAAAAGAAAGGCGGCCAGCGCCGGCTGCGGA<br>TGCGCCTGGCCGGTCCCCTCCAGCTCCTGCCGCGCGGGGCTCGAGGCGCCCATCCGCAC<br>AGTCTCTCTCGCCACGCCGCGCTCTCCTCGGGAACCGCCGCGCCAAAGCCCTCTCTC<br>CTCGTCGTCGCCGCGCCGCTCGA                                                                                                 |
| 114 | 42146934 | 42147523 | 590 | - | GTTCCAGCGAGCTGAAATGTGTGAGAATGTAGGGAACCTTAAGCATAAAAAAAGAGAG<br>TAGAGAACCTCGTACCTGCGACTTTATTCAATTTTTTTCACGGTCTAGCGTTTGAGCCGGA<br>AATTATTCTAGCAGTTGCATTAGCAAAAACACTTATCAAAATATTACTAACAGGCAGCGAA<br>GCAACACAAATACATCTTAGCTAGCAAAAGTAGTTGCATTAGCAAAATTTATTTACAAAATAC<br>CGAACTTATGTTTACAAACAAACACATATGTTTACAAACTTTAAATAACACCAAATCTCC<br>TGTTTAAAATTTGCATTAGCAACCAATCCGAACAGATCCGAAATGCACGTGACGAATGCG<br>CGAAAGCATTAAATTGTTCAGAAACAGCCCTGAAGGCTGAAGCTTAGTACGGTGTGTTGCG<br>TCCAGTTGGAAGTTGGAACCACTCTTCCAATCTGTCCCCGTTCGTCCGGTTATCCGGTGT<br>AGTGCGCCAGAAGAAGGGAGGAAGGGAGAGGGAGAATTCGGGGGACCACATTCCAAGTT<br>CCAACGGAGGCCGGAGAGGATGGTCCATGTCTGATGTC |
| 115 | 42310412 | 42310990 | 579 | + | AGGTGGAATTTGGCAATTAACATGGAATTAATTTCAATAAAGGCCTGGTAAATAGGTT<br>TGGGATTTAAACAGATTCCAATAGCAAAAGCATCAATCCAATTTCTGTACTAATTCCTCGT<br>TAACACAAATCGTACGGACTTTATAAGCTTTTAAATTTGCTAACGCAAAAAAGCTGATCA<br>GAGTATAATATTCAAAATCTACTGCATCGACAATGAACAAACCAAGAGTATGTTCAAAAT<br>GGGGAATTAAGCGAAAAATCTAACACAACAAAAGAAATATATTAGATGAAAAATATG<br>CTCAACTTGTGAGACTTCTCGGTGCGGTACGTCGCCAGCGAGAGGCACGCGATGA<br>ACTTGTCTTGAAGTGCATATCCGCTGTGGCCACCAACCAATCAAAACAACGCGTACA<br>AACCAAGCAGCAGCGTACACAGACGGAATGAATCAAAACCAACCGATCCCAATTCACCC<br>CCCTCCGCTTCGAGCCGCAAGCACACACCCAAACCGGCCCGTACCTTCACTATCCGGA<br>TGCGCGGATGCCGGCAACTCGTCGACGG                             |
| 116 | 42325296 | 42325885 | 590 | + | GCCTCAAATAGTATCACTTTGATTAATTACTAACCTACTAGTATCTCTATGCACTTGGAA<br>CATGCACAATCAATTTCTGATATTTTTCAAATCCATATTTCCCTAATCAAATATTTATCAA<br>ATTTTGTGCGTGCAATCTGGGCAATTTAGTACTTTGCGAGCATTATATCTATACAAGAA<br>ATACTCCGTATGAAAGAAATCTCAGTGGTCAACCCTAAATTAATGAAACACAAGGGGGTG<br>AAAGCGAAAGGAGATGAACATAAAACATGAACCAAGGGAGAGAAAAAAGGTT<br>CAACTACTCTTTCCATTCTCGCTCGCGCGCCTCCTCCTCTCCCAATTCGCCGCCAATTT<br>CCGGTGCCGACGAGGAGTCGGAGTCGGAGTCGCCTCGCCGGCGGCGTCCGAGTGTGTGT<br>GTGTATGTAATGGACGCCGACGAGCCGCCGAGCACAGACCCGACCCGCTCACGCGCCGC<br>GCCTGCAGCTGCTGCTGCAGGTAGGGTGTTCGACGCATGGGCTGCACCACCTCGCACGAC<br>GCGTTCGCCGACGAGGGCGCGGGCGCGGGCGTCTGTCG               |
| 117 | 42579010 | 42579591 | 582 | + | ATTAAGGATTTGATATATCACAAATGACAGTAATTAATTTGCTTGCTGTGTGTTTTATGAA<br>CTTCCTTAGCTGATCATGTTTTATTCCATCTTCACCTCGTTTACAGCTGCGAACGAATTC<br>GAAAGCATTAAATTAAGATTAGAGGCTGCAGAAATGCAATCAAGCAACAATAATGCATACT<br>AATATGGATTGCAAACTCTGGATTACAATAAGTTTTGATCTACGTTTTACTCGTTTCTCT<br>GTTTAGTTTCTGGTAATTTAGGAAGCAACACACCCATCTCGTTTTGATTCTTCTCTGGA<br>TTACGACTAAGTTGGCAGCTATGTCGTGTCGCGCGGCGCCGGCGAGGAAAGAGAATGGCA<br>CCGTCGCCGCCGCCGCCGCTCATCCGCCGCCGCCAGCAAACGTTCCAGTGCTCAACTCC<br>GGCAGCGCCGCCGCCGCCGTCGAGCCGACGTCGATGTTTCAGTCGCCGCGAGCGACG<br>GCGCTGCGGTGCGCGCAGGTGCGAGCCATCACCACCTACGGCATGTTCCCGACACCGGC<br>GCTTCGGCGGCGAGGACGGCCATGGCGG                  |
| 118 | 42580724 | 42581312 | 589 | - | CCAAGATTTGATCATGAAGTGGACATGAACCAAAAAATGTAAATAGTAACCAAGGTTTGA<br>CCATGAAGTAAAAATGTAAATAGTAACAGGATTTGACCATGAAGTAAAAATTGTAAAA<br>CAGTAACCAAGATTTAATCATGAAGTGGACATGAACCGAAAAAGTAAAAACAGTAACCAA<br>GATAATCTTGACCATGAAGTAAAAATGTAAACAGTAACAGGATTTGATCATGAAGTGA<br>ACATGCTACAAAATCAATCACAGTTTCTGTCTGAAAATTATTAGTCTTGTGACCTGGATG<br>GCGAGGCAATCTGGATGGAAGGTGGAGGGGCGAGGTGTCGAGCAGAGCAGCTGGCCGCC<br>GTCGGCGCAGACGCCGAGGCGTCTGCTGCAATCCTTGCCGCCGCCGTTCTTCTCACCT<br>GATGACGAGGAGAAGAGGTGGAGACGACGACGACGCCGTCGAGGAGCTGCATCTTCTTC                                                                                                                      |

|     |          |          |     |   |                                                                                                                                                                                                                                                                                                                                                                                                                                                                                                                                                                                                                                                                        |
|-----|----------|----------|-----|---|------------------------------------------------------------------------------------------------------------------------------------------------------------------------------------------------------------------------------------------------------------------------------------------------------------------------------------------------------------------------------------------------------------------------------------------------------------------------------------------------------------------------------------------------------------------------------------------------------------------------------------------------------------------------|
|     |          |          |     |   | GTCTTCGCGAGCTTCTCTTGGCCTGCGAGCTTCTCTCTCTCTGCTCCAGCGACGCCATG<br>GCCTTCTCCCGGGCGCGCATGGCGGTACCCGCTCTGCGCC                                                                                                                                                                                                                                                                                                                                                                                                                                                                                                                                                                |
| 119 | 42606697 | 42607289 | 593 | - | GCATTACCCTAGCAAATAAAATCTGTAAAAGAATGGT <b>TACATA</b> AAAAATCAATAACAACA<br>GAACAGGCAATATGGAATAATAACTACCTTTGTGTTGGCAATAAAAGCCCTTTGAACAGCA<br>AGTGCATCAGATTACGATCAGTTTCTGATGAGTTCAATGCATCAAACCTCTGGTTCAGCAGA<br>GATAAAGGAGCCATTTCTACAAGAGAAATAACGAACTTTTAGAACTGCATTT <b>CATATTAT</b><br><b>ATATAA</b> ATAAATAAGGAGATAAAAAATCATCATGAGGATAACCTATTTTCTGAACTGTCCA<br>CCCTCTTCTCCATCCAAAGACAAAACGATGTCATGAAATGCAACTAATGCTGGACGATGA<br>GAGATTGTTATGCATGATGTGCCATTGCTTGAACCTTTTGCAGAAACGCTTTCATATC<br>AGTTGTCACAGCACTAGTGCATTCATCCAGGATGGCAAACCTTTGGCCTATGGTAGAACAGC<br>CGGGCCATTCCCAATCTTTGTTGCTCTCCAAGAGACAATTATCACCCAGTTAACTTCCTTA<br>TCAAGAGGGTAGCGTTCTAGCAAATATCCAGATCCACCTA |
| 120 | 42661179 | 42661758 | 580 | - | TGCAACAAGTTTTGGAAAAGGT <b>TATATTATATAG</b> ATATTGGAGCATAAGTACCTGCTTGA<br>TCAACCGAATGTCTCGTAAAGCTTACACCATATCTTAGGATCCCATGTTTCCATTTTTGGAT<br>GAGCCTTTGCCATGTTTTGCATTCCACCTATTAAAGTTAAGGTGTAAGACACATAAAAGGAT<br>CAGAATAAAAA <b>ATTATAG</b> AAAAAGAATATTTTCAATTTTCACTACCTTAACACTTTCTGGCA<br>ATAGCCACCAATGCTTG <b>ATTATA</b> TTTTTGCACAGCTTAGGTAGTGATATGGTTTCTTATCA<br>TCGTAACCAGATGGGTGGCTTCTGTTTGGTCATAACTATCATCTCTGAAGAGGGGATG<br>GTAAATTCCCAAGTAGGTACAGGTG <b>GCCACT</b> GTATGAGGTTGTTAACCTCTGCTCTACC<br>TTATGTGGGTTCATACACAAGACCTTCAACAAGTATTTCCCTTCTCAGTTTCATCCCAATCC<br>AACGGATACCTCTGTAGCGTCTTACATTGCCCTCTGCAATGTAATCAAGGAATCTCACGAG<br>GGGCATGTCTTTGGGGGAATCCA     |
| 121 | 42668181 | 42668772 | 592 | - | CAGGTTGAATCTTTATGATTTTGTATGTTTCACTGATTAACCTTTGACATTATTTAATTGAAA<br>TTTTACCATAGTGGA <b>ATATAA</b> TTTTTGGGGCATATTTACCTTCTTGTGTTAACTTTCTTG<br>ATGTAAGGCCTGTCATGTTGTAGCAAAAAGAACATTTCAAT <b>TATAG</b> AAAAACATCTGGATTTC<br>TTTTGCATTGCTCATTTTACTTTCAGGACTTTATTTGAAAAAACATAAATGCTTGATTATTG<br>TTTCAACCACAGTGTGTGGAATAACATGTTTGCTTACAGCAGTAACCTTATTGACACTGA<br>ATTGGAGATGTTACATGTTAACCTTTGAAATCTGAACCTGGGATGTGTGTGTGTGGTGGT<br>GTGGTCAGGCCAAGAAGAAGATGGCGAGGCTGATACAAAGGATCATCCAGGACAAGAGG<br>GCAAGGAGGGCCGCCGCGGACGCCATCGATGTCCTCATCGAGACGGCAGCAATGAGC<br>TCACCGACAACTCATCTCTGACACCATGATCGACCTCATGATACCCGCAAGGACT <b>CCGTCC</b><br>CGGTTCTCATCATGCTCACCATCAAGTTCCTCAGCGAG  |
| 122 | 42734129 | 42734632 | 504 | - | GAAGTTTTGAAGAAAATTTGAAAAAGCAAATAATCTGAATTGCAAATCATTTAAAAAATA<br>AAAAATAAAACTGTACAATATCACGAGCATTGACTTGAATATGAAGTTTTGAAGAAAAAT<br>TTGAAAAAGCAAATAATCTGAATTGCAAATCATTTGAAAAAGAAAGTAATAAAAAATTATG<br>TTATGAAGAAAAATTTGAAAAGGCAAATAATCTGAATTGCAAATCATTTAAAAAATA <b>CAA</b><br><b>ATAATCTGAATTGCAAATCATTTAAAAATCAAAAAGTAAAAAGAAATCAATTAATCTGAAT</b><br><b>TGCAAATCATTA</b> AAAAAATCAAAAATCATTTAAAAAATCAAAAATAGTGCTGGCTGTGGG<br>GTTTCGAACCCACGCGCACTTCTGTGCAGAAAGATCTTAAGTCTTCCCCCTTAACCACTCGGGC<br><b>AAACCA</b> GCTAAACGACAGTGATGGTCATAAAATGTTCTAGTCTTGAAGCAACCGACTTG<br>CTGCATGGATGTCA                                                                                     |
| 123 | 43058624 | 43059216 | 593 | - | AGTAGGAGTAAAAAAAAAAAAATACTCCGATGACTTGAACAGGGACGGACCTATGATCGGC<br>CTAAGGACCGAGCCAGCCCATGAAGACTTAGACCTTGTATGCTGTTTACATTAGGCCTATT<br>GGGCCGAACGAGACGACGTATGATCATGTTTTGGGCCTCTTTTTGGAGAAGGGAAGGCC<br>CACAT <b>TATAG</b> ATGTGGTGGTCTGCTTGTGGTGGTGACAGGTCCTAACCTAGTAACCTACA<br>CTGTCACAAAATTCACAATCGATCGAGGATCCCAGGCGACGGAGCTCCGGCGAGCTCCG<br>GCGGGCGTCGGCGTCGGCGTCGGCGGCAGTTAGGGCGAGGCTATCTAGGGCATCAGAGA<br>TCCGGGATGGCGGTCCAGGTCCAGGAGTCGAAGCGGGTGGGGAGGCACTGCCCTCA<br>CCGGCCACCGCATCCGTCTCCCTCGCCGCTTCCATTCTCTCTCTCCGCCGCAAGCCTCC<br>CGAGCCGCTCCGCCGCGCCGTCGCCGACTGCCTCTCTCTCCCGCTCCACACCCACACCC<br>ATGCCCCGCCACCCGCCGCTTCTCTGCCCCGCCGAGGCTCCAGAA                        |
| 124 | 43101914 | 43102493 | 508 | - | ATCCCCTGGCCTGCAATGAAGTAGTAACAACCTCCATCTTAAAAATCGTAAGCAGTGGCA<br>AGCACTATTA AAAAGGATTTTTCATGTGTAGGTCCCTTTTACTTTTACTAAGGAGGAAAAAA<br>ATACCCGCT <b>TATA</b> AAAAATGTGCGAGAGGTGTTTGATCAAGGCCACATTTTAAATTTTAC<br>AAGTAGGTCTCTTAACAGATCCGTCTACAATAATAAATTATTTTCCAGACGAGCATCTTAA<br>GAGGTTTGTATGTGAAAATTGAGG <b>CACGAC</b> TGGCCGGCTCCATTTCCCATTTATTTATTTCT<br>TTCTTTTCTCTTATCAATCCATTTCACTTCTCTCTCTCTCTCTCTCTCTCTCTCTCTCTCT<br>TCTCTCTCTCTCTCTCTCTCTCTCTCTCTCTCTCTCTCTCTCTCTCTCTCTCTCTCTCTCT<br>GATCGCT <b>TATAG</b> AGGTTGGCGGCGACTGTGGAGGCCGACAGCGG <b>TGACG</b> ACGACAACAGA                                                                                               |

|     |          |          |     |   |                                                                                                                                                                                                                                                                                                                                                                                                                                                                                                                                                                                                                                                    |
|-----|----------|----------|-----|---|----------------------------------------------------------------------------------------------------------------------------------------------------------------------------------------------------------------------------------------------------------------------------------------------------------------------------------------------------------------------------------------------------------------------------------------------------------------------------------------------------------------------------------------------------------------------------------------------------------------------------------------------------|
|     |          |          |     |   | GATAGGTGGTGGCACATCTCCCTCTTCGATGACGGGAGGGGAAGAACCATCGAGGAGGG<br>CCCTAGCCATGGTGGATCTGTCTCCTGC                                                                                                                                                                                                                                                                                                                                                                                                                                                                                                                                                        |
| 125 | 43107547 | 43108108 | 562 | + | ATTTATGTTGCTCCTCAGTTGTCTTTTTCTCTGTGCAACAGCTCCGATTCCAGGCTCCCTGTTT<br>AGACAGTATGATGTACAAGGTCCAATTCCAGTTATAAAAGATGTTTTATCCCTCCAGACA<br>CAGAAGAAGATGGGCTGCCTGCTGCCCTTGAAGATGCCATGCCTCTAATTTCTTTTTTGCC<br>CCTCTATGTAAGAAGTGTACAGTTTGTAGTCAATTTGAACATGTAATAATGACAAGATA<br>AATTTACGAGCAGATCGACACATGCAAAGATCGAATTGCTGCTGCCCTTGATAAATTGCGA<br>TTTACGACATACATCTTCGTGGGAGCGAGGTGCTGCTTCTGGGCAGGAACCTGATACTGTT<br>TTACTTGGTGGCCGAGTTTTGGAGCAGCCATGTCTGCTCTAACTGACGCCCTCCCCGAC<br>GTCCTGCTTCTCTCCGCCGCCGCTCCTGCTGCTCCTCCGCCGTCGCCTACCCGTGTGAA<br>GCCGCTACACGCCGCTGGCGTCGCTGCCGCTGGAGCCGGTCCACGTCGCCGCCGCTCG<br>AGGTCGCC                                         |
| 126 | 43217504 | 43218096 | 593 | - | CACCCTGTTAGCATATTATGGAGGAAAAACAACCAACCAACGGCACTCTTGAACCAAGAA<br>GATATAATCACAACAAATTGTGAATACAAATTTAAAAACAACAAATTTGATTGATACCTAT<br>GCATTGAATATGTGGGAGATTAAAGAAGTAGTGACTTTAATACTATATATAGCATCCAAA<br>TGTTTACAGCATCATCAAGTTAAAGGATCGATCAGAGGGGGAAGGCGTGTGGGTTAGAAG<br>AGGAGACAAGGAAGGAGGAGGATGTGGGTGTGGTGGAAGCTGACGCGAGTACAGGTCT<br>AGTCGAGTGGAAGCCATTGTTAAGCTGATCATGGTGGTCATGTTTATGGAAGCAGATGA<br>GGTGCCAGTGTAGGAGGTGGAGGTGGAGGTAGAGATGGAGGCGGAGGAGGATTGGCGC<br>GGTCGGCGGCGTGGTGCAGGGCCCTTCTCGGCCAGACGAGCTCCTGCAGCTTGACAGCC<br>TGCGCGTCGGGGTAGTAGCCCCAGAAGGCGCAGGTGCAACAGGCGGCGGAGGGCGTGA<br>GGTTGGTGCCGGCCCGGTGGATGTAGCGGTGGCTGTACCTTCTTCCCAAGCAATCGA |
